1 **Microbial byproducts determine reproductive fitness of free-living and**  
2 **parasitic nematodes**

3

4 Mericien Venzon<sup>\*1,2</sup>, Ritika Das<sup>\*2,4</sup>, Daniel J. Luciano<sup>2,5</sup>, Hyun Shin Park<sup>6</sup>, Eric T. Kool<sup>7</sup>,  
5 Joel G. Belasco<sup>2,5</sup>, E. Jane Albert Hubbard<sup>2,3,4,†</sup>, Ken Cadwell<sup>2,5,8,†</sup>

6

7 1. Vilcek Institute of Graduate Biomedical Sciences, New York University Grossman  
8 School of Medicine, New York, NY, USA

9 2. Kimmel Center for Biology and Medicine at the Skirball Institute, New York  
10 University Grossman School of Medicine, New York, NY, USA

11 3. Department of Pathology, New York University Grossman School of Medicine,  
12 New York, NY, USA

13 4. Department of Cell Biology, New York University Grossman School of Medicine,  
14 New York, NY, USA

15 5. Department of Microbiology, New York University Grossman School of Medicine,  
16 New York, NY, USA

17 6. Seegene Inc., Ogeum-ro, Songpa-Gu, Seoul, Republic of Korea

18 7. Department of Chemistry, Stanford Cancer Institute and ChEM-H Institute,  
19 Stanford University, Stanford, CA, USA

20 8. Division of Gastroenterology, Department of Medicine, New York University  
21 Grossman School of Medicine, New York, NY, USA

22 \* These authors contributed equally

23 †Co-corresponding, equal contribution

24

25 **Correspondence:**

26 [jane.hubbard@nyulangone.org](mailto:jane.hubbard@nyulangone.org)

27 [ken.cadwell@nyulangone.org](mailto:ken.cadwell@nyulangone.org)

28 **Abstract**

29 *Trichuris* nematodes reproduce within the microbiota-rich mammalian intestine, yet  
30 microbial byproducts that facilitate the parasite lifecycle are unknown. Here, we report a  
31 novel pipeline to identify microbial factors with conserved roles in the reproduction of  
32 nematodes. A screen for *E. coli* mutants that impair *C. elegans* fertility identified genes  
33 in fatty acid biosynthesis and ethanolamine utilization pathways, including *fabH* and  
34 *eutN*. *Trichuris muris* eggs displayed defective hatching in the presence of *E. coli*  
35 deficient in *fabH* or *eutN* due to reduction in arginine or elevated levels of aldehydes,  
36 respectively. Remarkably, *T. muris* reared in gnotobiotic mice colonized with these *E.*  
37 *coli* mutants failed to lay viable eggs. These findings indicate that microbial byproducts  
38 mediate evolutionarily conserved transkingdom interactions that impact reproductive  
39 fitness of distantly-related nematodes.

40

41 **One-Sentence Summary:** Byproducts from the microbiota contribute to the life cycles  
42 of distantly-related free-living and parasitic worms.

43 **Main text**

44 The reproductive success of the parasitic nematode *Trichuris trichuira* is evidenced by  
45 the over 400 million individuals colonized by this soil-transmitted helminth (1). Its  
46 enormous reproductive capacity contributes to its infectious spread and hampers  
47 parasite eradication efforts. A distinct feature of *Trichuris* species is that reproductive  
48 development, from egg hatching to egg laying, is completed exclusively within the host  
49 digestive tract (2, 3). A new infection begins when embryonated eggs ingested from the  
50 environment hatch in the host cecum, a region within the gastrointestinal tract populated  
51 by a dense community of bacteria. Although bacteria mediate egg hatching for *Trichuris*  
52 *muris* (4-6), the *Trichuris* species that infects mice, a role for bacteria at later stages of  
53 *Trichuris* development remains unclear. Our group and others have shown that *Trichuris*  
54 infections in mice and humans affect the bacterial composition of the gut microbiota (6-  
55 13). Additionally, the *T. muris* microbiota harbors taxa similar to those observed in the  
56 murine host microbiota, with a notable enrichment of Proteobacteria, including Gram-  
57 negative commensals like *E. coli* (6).

58 For the free-living nematode *C. elegans*, reducing the quantity or quality of the  
59 bacterial diet, or interfering with nutrient uptake, can impair germline development with  
60 consequences for fertility (14-19). Because of the high degree of conservation of body  
61 plan and neuromuscular system organization within the phylum Nematoda, *C. elegans*  
62 has been used as a model for the discovery of anthelmintics for more than four decades  
63 (20, 21). Therefore, we hypothesized that bacteria-derived essential requirements for  
64 reproductive development in the well-characterized, model organism *C. elegans* are  
65 conserved in *Trichuris*.

66 To identify bacteria-derived factors that impact nematode reproduction, we  
67 assessed fertility of young adult *C. elegans* raised on a library of viable *E. coli* mutants.  
68 We used *C. elegans* bearing a temperature-sensitive mutation in the gene encoding the  
69 GLP-1 Notch receptor, *glp-1(e2141)*, to facilitate quantification of fertility. At the semi-  
70 permissive temperature of 20°C, the number of germline progenitor cells is roughly half  
71 of the wild type (22), thereby sensitizing the worms to fertility defects when signaling  
72 pathways conveying nutritional sufficiency are altered (14, 18). The *C. elegans* strain  
73 also carried fluorescent markers for the pharynx and for embryos (23) to facilitate  
74 counting and staging the worms, and to determine whether individual worms contained  
75 embryos (gravid) (Fig. 1, A-B). Wells were excluded from subsequent analyses if *E. coli*  
76 failed to grow, or if *C. elegans* exhibited developmental arrest or severely delayed  
77 growth. Using a series of selection criteria that considered both plate-by-plate statistical  
78 comparisons and penetrance, our primary screen of ~3000 of the 3985 *E. coli* mutants  
79 in the Keio library identified 315 bacterial mutants that reduced the percentage of gravid  
80 worms at the established time point (Fig. 1, C-D).

81 After these 315 *E. coli* mutants were re-screened in biological triplicate, ten  
82 mutants significantly reduced the penetrance of embryo-bearing *C. elegans* compared  
83 to our wild-type (WT) *E. coli* strain (GC1547) in at least two out of three biological  
84 replicates (Fig. 1C and S1, A-B). Seven of the ten *E. coli* genes fell into three functional  
85 groups related to ethanolamine utilization, fatty acid biosynthesis or lipopolysaccharide  
86 synthesis (Table S1).

87 We focused on the *E. coli* mutants  $\Delta fabF$ ,  $\Delta fabH$ ,  $\Delta eutD$ , and  $\Delta eutN$ , because  
88 they were associated with the greatest reduction in embryo-bearing *C. elegans* (Fig.

89 1E). Complementation with a plasmid carrying the wild-type *fabH* or *eutN* sequences  
90 confirmed their functional relevance in the *C. elegans* fertility delay phenotype (Fig.  
91 S1C). For *fabF*, we rederived the *E. coli* deletion mutant by using P1 phage to  
92 transduce the original  $\Delta fabF::kan$  allele from the Keio library strain into the Keio  
93 progenitor strain BW25113 (Fig. S1, D-E). Similar to the original mutant, the  
94 transductant caused a significant reduction in the percentage of embryo-bearing *C.*  
95 *elegans*.

96 To assess whether these *E. coli* mutants delayed somatic and/or germline  
97 development of *C. elegans*, we performed a time-course analysis of vulval development  
98 (24) and assayed for enhancement of the Pro phenotype caused by a weak *glp-1(gf)*  
99 mutation (25). The latter assay is a proxy for delayed germline development relative to  
100 somatic development (26). Among the four mutants, only worms fed  $\Delta eutN$  exhibited  
101 delayed somatic development, with an additional germline delay relative to somatic  
102 development (Fig. 1, F-G). Worms fed  $\Delta fabF$  displayed delayed germline development  
103 without the somatic delay, while  $\Delta fabH$  and  $\Delta eutD$  developed comparably with worms  
104 fed WT *E. coli*. When we prolonged the assay by scoring the worms on Day 2—24  
105 hours after the initial screening time-point (Day 1)—the percentage of gravid worms  
106 significantly increased, indicating that feeding on these *E. coli* mutants delayed *C.*  
107 *elegans* fertility rather than induced permanent sterility (Fig. 1H). We also found no  
108 significant differences when comparing the number of germline progenitor zone (PZ)  
109 nuclei in *C. elegans* raised on each mutant or WT *E. coli* at the L4-to-adult molt (Fig. S1,  
110 F-G), indicating that the delay in fertility is not likely due to slower accumulation of the  
111 PZ during larval stages (14, 27, 28).

112 DAF-2 insulin/IGF-like and DAF-7 TGF $\beta$  signaling pathways link nutrition and  
113 fertility (16-18, 22). However, constitutive activation of these pathways (by loss of DAF-  
114 16 FOXO or DAF-5, respectively) did not substantially mitigate the delay in fertility  
115 caused by the *E. coli* mutants. Loss of *daf-16* actually exacerbated the penetrance of  
116 non-gravid worms, even with WT *E. coli* (Fig. S1H), whereas constitutive activation of  
117 the DAF-7 TGF $\beta$  pathway via loss of *daf-5* had no effect on fertility of *C. elegans* raised  
118 on  $\Delta$ *eutD* and a modest effect with  $\Delta$ *eutN*,  $\Delta$ *fabF* and  $\Delta$ *fabH* (Fig. S1I). Loss of *daf-5*  
119 also elevated penetrance of gravid *C. elegans* raised on WT *E. coli* to a similar or  
120 greater extent. We conclude that neither pathway likely mediates the effects of these *E.*  
121 *coli* mutants on the timing of *C. elegans* fertility.

122 Having identified *E. coli* mutants that impede fertility of a free-living nematode,  
123 we examined whether these bacteria impact a distantly-related parasitic nematode. *T.*  
124 *muris* egg hatching was shown to be the reproductive stage sensitive to the presence of  
125 bacteria (4, 6). Thus, to begin investigating possible effects of the mutants identified in  
126 our *C. elegans* screen on the *Trichuris* lifecycle, we adapted a previously described  
127 method to quantify *E. coli*-mediated hatching kinetics of embryonated *T. muris* eggs *in*  
128 *vitro* (4) (Fig. 2A). All *E. coli* mutants were confirmed to have similar growth kinetics to  
129 WT *E. coli* (Fig. S2). Two of the mutants tested,  $\Delta$ *eutN* and  $\Delta$ *fabH*, elicited significantly  
130 reduced hatching compared to rates mediated by WT *E. coli* (Fig. 2B).

131 Complementation of  $\Delta$ *eutN* or  $\Delta$ *fabH* with their wild-type genes rescued hatching (Fig.  
132 S3).

133 To determine whether reduced egg hatching is due to the production of a toxic  
134 factor, we performed the hatching assay utilizing WT *E. coli* mixed with each mutant in a

135 9:1 or 1:1 ratio (Fig. 2C). As little as 10%  $\Delta eutN$  in the mixture significantly inhibited the  
136 ability of WT *E. coli* to mediate hatching, whereas the presence of  $\Delta fabH$  had no effect.  
137 Thus, the inhibitory effect of  $\Delta eutN$  is dominant over WT *E. coli*, implicating the  
138 production of a toxic factor by this mutant, while the reduced hatching rate of  
139 embryonated eggs incubated with  $\Delta fabH$  is likely due to deficiency of a pro-hatching  
140 factor.

141 Hybrid metabolomics revealed an unexpectedly low relative level of arginine and  
142 ornithine in  $\Delta fabH$  cell lysates compared to WT *E. coli* (Fig. 2D). Supplementation of  
143  $\Delta fabH$  cultures with 500 $\mu$ M arginine partly suppressed the *C. elegans* fertility delay  
144 without elevating the baseline fertility seen in the control (Fig. 2E and S4, A-B). We  
145 observed a similar result with ornithine supplementation (Fig. 2F and S4C).  
146 Supplementation of  $\Delta fabH$  cultures with arginine or ornithine also successfully rescued  
147 *T. muris* egg hatching to levels similar to WT *E. coli* (Fig. 2, G-H and S4, D-E).  
148 Consistent with a role for the arginine biosynthesis pathway, we found that *Trichuris* egg  
149 hatching was diminished in the presence of  $\Delta argE$  or  $\Delta argH$  *E. coli*, mutants defective in  
150 ornithine and arginine synthesis, respectively (Fig. 2, I-J).

151 Although optimal *T. muris* egg hatching *in vitro* requires physical contact with *E.*  
152 *coli* (4, 5), a reduced amount of hatching can still occur in a transwell system that  
153 separates bacteria and eggs into different chambers (5), suggesting that both contact-  
154 dependent and independent factors contribute to the process. Similar to previous  
155 reports, eggs hatched at approximately 50% their maximum rate when incubated  
156 separately from WT *E. coli* in a transwell system (Fig. 2, K-L). Hatching was further  
157 reduced when  $\Delta fabH$  was used as the bacterium. Supplementation of ornithine restored

158 hatching in the presence of  $\Delta fabH$  to levels similar to those elicited by WT *E. coli* in the  
159 transwell system. Altogether, these findings indicate that nematode pathways regulated  
160 by ornithine and arginine contribute to contact-independent *E. coli*-mediated hatching of  
161 *T. muris* embryonated eggs.

162 To understand why *T. muris* eggs incubated with  $\Delta eutN$  *E. coli* displayed the  
163 greatest reduction in hatching, we first determined whether disrupting other parts of the  
164 ethanolamine utilization pathway (Fig. 3A) led to similar outcomes. *E. coli* mutants  
165 lacking enzymes in the pathway— $\Delta eutB$ ,  $\Delta eutC$ ,  $\Delta eutD$ ,  $\Delta eutE$ , and  $\Delta eutG$ —facilitated  
166 egg hatching at rates similar to WT *E. coli* (Fig. 3B). In contrast to these *eut* operon  
167 genes, *eutN* encodes a subunit of a proteinaceous shell that enables the efficient  
168 colocalization of the *eut* enzymes with their cofactors and substrates within a  
169 microcompartment and prevents diffusion of pathway intermediates (29). It is possible  
170 that disruption of the microcompartment architecture allows the release of a soluble  
171 toxic intermediate. Therefore, we tested whether transferring the supernatant from  
172  $\Delta eutN$  culture was sufficient to inhibit the ability of WT *E. coli* to mediate hatching (Fig.  
173 3C). Although transferring culture supernatant from  $\Delta eutN$  grown in isolation had no  
174 effect, supernatant isolated from  $\Delta eutN$  that had been incubated with eggs reduced  
175 hatching mediated by WT *E. coli* (Fig. 3D). This suggests that  $\Delta eutN$  produces a soluble  
176 toxic factor in the presence of *T. muris* embryonated eggs.

177 Acetaldehyde is a known intermediate of the ethanolamine utilization pathway  
178 that can readily form irreversible adducts with proteins, changing their conformation and  
179 function (30, 31). Additionally, deletion of *eutN* in *Salmonella* resulted in the greatest  
180 increase in acetaldehyde volatility among all *eut* operon mutants during the first hours of



181 growth (32). Using a fluorogenic hydrazone transfer (DarkZone) system to label  
182 aldehydes (33), we detected elevated levels of aldehydes in the culture supernatant of  
183  $\Delta eutN$  that had been incubated with *T. muris* eggs, but not in the culture supernatant of  
184 the complemented  $\Delta eutN$  strain or when the mutant was grown in the absence of eggs  
185 (Fig. 3E and S5A). Aldehyde levels were also elevated in  $\Delta eutD$ , the other *E. coli*  
186 mutant of this pathway identified by the *C. elegans* screen, although the increase  
187 following egg incubation was not as striking as for  $\Delta eutN$ , potentially explaining why  
188 deletion of *eutD* did not inhibit hatching (Fig. 3E). Next, we deleted the rate limiting  
189 enzyme of the ethanolamine utilization pathway, *eutC*, in the  $\Delta eutN$  background  
190 ( $\Delta eutN\Delta eutC$ ) to prevent the formation of toxic intermediates (32, 34). We found that  
191 aldehyde levels of  $\Delta eutN\Delta eutC$  were similar to that of WT *E. coli* and that *T. muris* egg  
192 hatching was completely restored when the assay was performed with this double  
193 mutant (Fig. 3E-F). Additionally, we found that supplementation with acetaldehyde was  
194 sufficient to inhibit hatching elicited by WT *E. coli* in a concentration-dependent manner  
195 and confirmed that bacteria viability was unaffected (Fig. S5, B-C).

196 *In vitro T. muris* egg hatching serves as a sensitive assay to investigate  
197 nematode-bacteria interactions, but the role of intestinal bacteria in subsequent steps of  
198 *Trichuris* development remains obscure because they are difficult to recreate outside  
199 the mammalian host. Given that the *C. elegans* screen was focused on development of  
200 the reproductive tract, we established a bacterial monocolonization mouse model to  
201 investigate the role of bacterial *fabH*, *eutN*, and *eutD* in *T. muris* development and  
202 reproduction (Fig. 4A). After we verified that each *E. coli* mutant colonized germ-free  
203 mice to levels similar to WT *E. coli* (Fig. S6A), monocolonized mice were gavaged twice

204 with 100 eggs and sacrificed two weeks after the second gavage. We were able to  
205 recover adult worms from the cecum of mice monocolonized with WT *E. coli* but not  
206 germ-free mice (Fig. S6B), consistent with previous observations (6), indicating that our  
207 assay allows investigation of mechanisms by which *E. coli* contributes to *T. muris*  
208 development in an intact host. Our experimental setup in which mice receive high doses  
209 of embryonated eggs was designed to overcome the potential reduced hatching  
210 efficiency that may occur in mice lacking a complex microbiota. Therefore, as expected,  
211 we did not detect any differences in worm burden when comparing mice colonized with  
212 WT *E. coli* versus  $\Delta fabH$ ,  $\Delta eutN$ , and  $\Delta eutD$  strains (Fig. S6B). However, many of the  
213 *T. muris* recovered from mice colonized with these mutants displayed a striking  
214 deformity characterized by shortened length (Fig. 4, B-C; indicated by arrowheads).  
215 Although worms from WT *E. coli*-colonized mice were exclusively long in length, mice  
216 colonized with  $\Delta fabH$ ,  $\Delta eutN$ , and  $\Delta eutD$  *E. coli* produced a mixture of both long and  
217 short length worms, defined as < 1cm. The defect was most severe in mice  
218 monocolonized with  $\Delta eutN$  from which most worms recovered were short.

219 The average number of freshly laid eggs per worm was not significantly different  
220 between the conditions (Figure S6C). However, in stark contrast to worms from WT *E.*  
221 *coli*-colonized mice, which laid eggs of the typical ovoid structure, eggs laid by worms  
222 harvested from mice colonized with  $\Delta fabH$ ,  $\Delta eutD$ , and  $\Delta eutN$  *E. coli* displayed an  
223 aberrant rounded morphology, and in some cases lacked opercula and a distinct shell,  
224 and the inner contents were disorganized (Fig. 4, D-E). These structurally aberrant eggs  
225 took longer to reach embryonated morphology, and even after a prolonged incubation  
226 period, significantly fewer eggs appeared embryonated in the  $\Delta eutN$  and  $\Delta eutD$  groups

227 (Fig. 4F). Eggs laid by worms from all three mutant-colonized groups of mice had  
228 significantly lower hatching rates compared to eggs laid by worms from WT *E. coli*-  
229 colonized mice when tested for bacteria-mediated hatching *in vitro* (Fig. 4G). Finally,  
230 monocolonization with  $\Delta eutN\Delta eutC$  abrogated the length and egg fitness defects of *T.*  
231 *muris* observed in  $\Delta eutN$ -colonized mice (Fig. S7). Thus, bacterial products are  
232 important for the reproductive development of *T. muris in vivo*.

233 Despite the wide taxonomic divergence between *C. elegans* and *T. muris*, our  
234 screen for bacterial factors impacting fertility in *C. elegans* identified two pathways that  
235 impact *T. muris* biology. Our finding that bacterial deficiencies decrease *T. muris* worm  
236 size and egg fitness is in line with recent evidence showing that another parasitic  
237 nematode *Heligmosomoides polygyrus*, lays fewer eggs and exhibits similar length  
238 defects when reared in a germ-free host (35). Our results also provide evidence for a  
239 previously undescribed role for byproducts of microbial metabolism on nematode  
240 development, a role that appears evolutionarily conserved. Despite lacking many genes  
241 specific to parasitism, our findings support the utility of *C. elegans* as a model for  
242 bacteria-nematode interactions because of its high sensitivity to its bacterial milieu.  
243 Focusing on microbiota-nematode interactions has also revealed vulnerabilities of  
244 *Trichuris* that have implications for transmission dynamics and may be useful for  
245 controlling life-long infections in areas where helminths are endemic because of  
246 ineffective deworming treatment and high rates of reinfection. We propose that *C.*  
247 *elegans* can be used as a novel system for investigating the effects of specific microbial  
248 genes and pathways in supporting the parasitic nematode life cycle and aid in further  
249 understanding the transkingdom interactions that sustain human disease.

250 **References**

251

- 252 1. G. B. D. Disease, I. Injury, C. Prevalence, Global, regional, and national  
253 incidence, prevalence, and years lived with disability for 310 diseases and  
254 injuries, 1990-2015: a systematic analysis for the Global Burden of Disease  
255 Study 2015. *Lancet* **388**, 1545-1602 (2016).
- 256 2. M. A. Fahmy, An investigation on the life cycle of *Trichuris muris*. *Parasitology*  
257 **44**, 50-57 (1954).
- 258 3. T. Panesar, The moulting pattern in *Trichuris muris* (Nematoda: Trichuroidea).  
259 *Canadian journal of zoology* **67**, 2340-2343 (1989).
- 260 4. K. S. Hayes *et al.*, Exploitation of the intestinal microflora by the parasitic  
261 nematode *Trichuris muris*. *Science* **328**, 1391-1394 (2010).
- 262 5. K. Koyama, Bacteria-induced hatching of *Trichuris muris* eggs occurs without  
263 direct contact between eggs and bacteria. *Parasitol Res* **115**, 437-440 (2016).
- 264 6. E. C. White *et al.*, Manipulation of host and parasite microbiotas: Survival  
265 strategies during chronic nematode infection. *Sci Adv* **4**, eaap7399 (2018).
- 266 7. D. Ramanan *et al.*, Helminth infection promotes colonization resistance via type 2  
267 immunity. *Science* **352**, 608-612 (2016).
- 268 8. B. A. Rosa *et al.*, Whipworm-Associated Intestinal Microbiome Members  
269 Consistent Across Both Human and Mouse Hosts. *Front Cell Infect Microbiol* **11**,  
270 637570 (2021).
- 271 9. S. C. Lee *et al.*, Helminth colonization is associated with increased diversity of  
272 the gut microbiota. *PLoS Negl Trop Dis* **8**, e2880 (2014).
- 273 10. T. P. Jenkins *et al.*, Infections by human gastrointestinal helminths are  
274 associated with changes in faecal microbiota diversity and composition. *PLoS*  
275 *One* **12**, e0184719 (2017).
- 276 11. J. B. Holm *et al.*, Chronic *Trichuris muris* Infection Decreases Diversity of the  
277 Intestinal Microbiota and Concomitantly Increases the Abundance of Lactobacilli.  
278 *PLoS One* **10**, e0125495 (2015).

- 279 12. A. Houlden *et al.*, Chronic *Trichuris muris* Infection in C57BL/6 Mice Causes  
280 Significant Changes in Host Microbiota and Metabolome: Effects Reversed by  
281 Pathogen Clearance. *PLoS One* **10**, e0125945 (2015).
- 282 13. J. Schachter *et al.*, Whipworm Infection Promotes Bacterial Invasion, Intestinal  
283 Microbiota Imbalance, and Cellular Immunomodulation. *Infect Immun* **88**, (2020).
- 284 14. D. Z. Korta, S. Tuck, E. J. Hubbard, S6K links cell fate, cell cycle and nutrient  
285 response in *C. elegans* germline stem/progenitor cells. *Development* **139**, 859-  
286 870 (2012).
- 287 15. X. Gracida, C. R. Eckmann, Fertility and germline stem cell maintenance under  
288 different diets requires *nhr-114/HNF4* in *C. elegans*. *Curr Biol* **23**, 607-613  
289 (2013).
- 290 16. T. A. Starich, X. Bai, D. Greenstein, Gap junctions deliver malonyl-CoA from  
291 soma to germline to support embryogenesis in *Caenorhabditis elegans*. *Elife* **9**,  
292 (2020).
- 293 17. O. Pekar *et al.*, Linking the environment, DAF-7/TGFbeta signaling and LAG-  
294 2/DSL ligand expression in the germline stem cell niche. *Development* **144**,  
295 2896-2906 (2017).
- 296 18. D. Dalfo, D. Michaelson, E. J. Hubbard, Sensory regulation of the *C. elegans*  
297 germline through TGF-beta-dependent signaling in the niche. *Curr Biol* **22**, 712-  
298 719 (2012).
- 299 19. B. Spanier *et al.*, The Reproduction Rate of Peptide Transporter PEPT-1  
300 Deficient *C. elegans* Is Dependent on Dietary Glutamate Supply. *Front Mol Biosci*  
301 **5**, 109 (2018).
- 302 20. D. Sepulveda-Crespo, R. M. Reguera, F. Rojo-Vazquez, R. Balana-Fouce, M.  
303 Martinez-Valladares, Drug discovery technologies: *Caenorhabditis elegans* as a  
304 model for anthelmintic therapeutics. *Med Res Rev* **40**, 1715-1753 (2020).
- 305 21. G. Salinas, G. Risi, *Caenorhabditis elegans*: nature and nurture gift to nematode  
306 parasitologists. *Parasitology* **145**, 979-987 (2018).
- 307 22. D. Michaelson, D. Z. Korta, Y. Capua, E. J. Hubbard, Insulin signaling promotes  
308 germline proliferation in *C. elegans*. *Development* **137**, 671-680 (2010).

- 309 23. D. Roy, D. J. Kahler, C. Yun, E. J. A. Hubbard, Functional Interactions Between  
310 rsk-1/S6K, glp-1/Notch, and Regulators of *Caenorhabditis elegans* Fertility and  
311 Germline Stem Cell Maintenance. *G3 (Bethesda)* **8**, 3293-3309 (2018).
- 312 24. D. Z. Mok, P. W. Sternberg, T. Inoue, Morphologically defined sub-stages of *C.*  
313 *elegans* vulval development in the fourth larval stage. *BMC Dev Biol* **15**, 26  
314 (2015).
- 315 25. A. S. Pepper, T. W. Lo, D. J. Killian, D. H. Hall, E. J. Hubbard, The establishment  
316 of *Caenorhabditis elegans* germline pattern is controlled by overlapping proximal  
317 and distal somatic gonad signals. *Dev Biol* **259**, 336-350 (2003).
- 318 26. E. J. A. Hubbard, T. Schedl, Biology of the *Caenorhabditis elegans* Germline  
319 Stem Cell System. *Genetics* **213**, 1145-1188 (2019).
- 320 27. I. Agarwal *et al.*, HOP-1 Presenilin Deficiency Causes a Late-Onset Notch  
321 Signaling Phenotype That Affects Adult Germline Function in *Caenorhabditis*  
322 *elegans*. *Genetics* **208**, 745-762 (2018).
- 323 28. Z. Kocsisova, K. Kornfeld, T. Schedl, Rapid population-wide declines in stem cell  
324 number and activity during reproductive aging in *C. elegans*. *Development* **146**,  
325 (2019).
- 326 29. T. O. Yeates, C. S. Crowley, S. Tanaka, Bacterial microcompartment organelles:  
327 protein shell structure and evolution. *Annu Rev Biophys* **39**, 185-205 (2010).
- 328 30. M. F. Sorrell, D. J. Tuma, The functional implications of acetaldehyde binding to  
329 cell constituents. *Ann N Y Acad Sci* **492**, 50-62 (1987).
- 330 31. T. M. Donohue, Jr., D. J. Tuma, M. F. Sorrell, Acetaldehyde adducts with  
331 proteins: binding of [<sup>14</sup>C]acetaldehyde to serum albumin. *Arch Biochem Biophys*  
332 **220**, 239-246 (1983).
- 333 32. J. T. Penrod, J. R. Roth, Conserving a volatile metabolite: a role for  
334 carboxysome-like organelles in *Salmonella enterica*. *J Bacteriol* **188**, 2865-2874  
335 (2006).
- 336 33. L. H. Yuen, N. S. Saxena, H. S. Park, K. Weinberg, E. T. Kool, Dark Hydrazone  
337 Fluorescence Labeling Agents Enable Imaging of Cellular Aldehydic Load. *ACS*  
338 *Chem Biol* **11**, 2312-2319 (2016).

- 339 34. D. M. Roof, J. R. Roth, Functions required for vitamin B12-dependent  
340 ethanolamine utilization in *Salmonella typhimurium*. *J Bacteriol* **171**, 3316-3323  
341 (1989).
- 342 35. S. Rausch *et al.*, Parasitic Nematodes Exert Antimicrobial Activity and Benefit  
343 From Microbiota-Driven Support for Host Immune Regulation. *Front Immunol* **9**,  
344 2282 (2018).
- 345 36. K. G. Kaval, D. A. Garsin, Ethanolamine Utilization in Bacteria. *mBio* **9**, (2018).
- 346 37. S. Shaham, WormBook. *Methods in cell biology*, (2006).
- 347 38. L. C. Thomason, N. Costantino, D. L. Court, E. coli Genome Manipulation by P1  
348 Transduction. *Current Protocols in Molecular Biology* **79**, 1.17.11-11.17.18  
349 (2007).
- 350 39. T. Baba *et al.*, Construction of *Escherichia coli* K-12 in-frame, single-gene  
351 knockout mutants: the Keio collection. *Mol Syst Biol* **2**, 2006 0008 (2006).
- 352 40. P. P. Cherepanov, W. Wackernagel, Gene disruption in *Escherichia coli*: TcR  
353 and KmR cassettes with the option of Flp-catalyzed excision of the antibiotic-  
354 resistance determinant. *Gene* **158**, 9-14 (1995).
- 355 41. F. Antignano, S. C. Mullaly, K. Burrows, C. Zaph, *Trichuris muris* infection: a  
356 model of type 2 immunity and inflammation in the gut. *J Vis Exp*, (2011).
- 357 42. I. Irnov *et al.*, Crosstalk between the tricarboxylic acid cycle and peptidoglycan  
358 synthesis in *Caulobacter crescentus* through the homeostatic control of alpha-  
359 ketoglutarate. *PLoS Genet* **13**, e1006978 (2017).
- 360 43. M. E. Pacold *et al.*, A PHGDH inhibitor reveals coordination of serine synthesis  
361 and one-carbon unit fate. *Nat Chem Biol* **12**, 452-458 (2016).
- 362 44. W. W. Chen, E. Freinkman, T. Wang, K. Birsoy, D. M. Sabatini, Absolute  
363 Quantification of Matrix Metabolites Reveals the Dynamics of Mitochondrial  
364 Metabolism. *Cell* **166**, 1324-1337 e1311 (2016).
- 365 45. Y. Simon-Manso *et al.*, Metabolite profiling of a NIST Standard Reference  
366 Material for human plasma (SRM 1950): GC-MS, LC-MS, NMR, and clinical  
367 laboratory analyses, libraries, and web-based resources. *Anal Chem* **85**, 11725-  
368 11731 (2013).

- 369 46. C. A. Smith *et al.*, METLIN: a metabolite mass spectral database. *Ther Drug*  
370 *Monit* **27**, 747-751 (2005).
- 371 47. P. Virtanen *et al.*, SciPy 1.0: fundamental algorithms for scientific computing in  
372 Python. *Nat Methods* **17**, 261-272 (2020).
- 373 48. R. Kolde. (2015).
- 374 49. M. I. Love, W. Huber, S. Anders, Moderated estimation of fold change and  
375 dispersion for RNA-seq data with DESeq2. *Genome Biol* **15**, 550 (2014).
- 376 50. P. K. Martin *et al.*, Autophagy proteins suppress protective type I interferon  
377 signalling in response to the murine gut microbiota. *Nat Microbiol* **3**, 1131-1141  
378 (2018).



379 **Acknowledgements**

380 We wish to thank D. Jones, R. Rose, and L. Ash from the NYU Langone Health  
381 Metabolomics Laboratory (SCR\_017935; funded by P30CA016087) and C. Yun, S.  
382 Cook, and D. Kahler from the High Throughput Biology Core for their help in acquiring  
383 and analyzing the data presented. We also thank H. Darwin for advice on microbial  
384 metabolism; S. Marion, C. Linton, M. Xu, A. Niranjana, D. Stokes, M. Lopez-Redondo, I.  
385 Irnov, V. Torres, S. Dyzenhaus, M. Hui, J. Richards (NYU), P. Loke, J. Lin (NIH), L.  
386 Webb, and E. Tait Wojno (Univ. of Washington) for technical assistance and reagents;  
387 members of the Hubbard and Cadwell Labs and NYU Medical Scientist Training  
388 Program for constructive comments; and M. Alva, J. Carrasquillo, and D. Basnight for  
389 assistance with gnotobiotics. Figures 2A, 2K, 3A, 3C, and 4A were created using  
390 BioRender.com.

391

392 **Funding**

393 NIH grant DK093668 (K.C.)  
394 NIH grant AI121244 (K.C.)  
395 NIH grant HL123340 (K.C.)  
396 NIH grant AI130945 (K.C.)  
397 NIH grant AI140754 (K.C.)  
398 NIH grant DK124336 (K.C.)  
399 NIH grant R01GM130152 (E.J.A.H.)  
400 NIH grant R35GM134876 (E.J.A.H.)  
401 NIH grant 5T32AI100853 (M.V.)  
402 NIH grant GM126573 (M.V.)  
403 Faculty Scholar grant from the Howard Hughes Medical Institute (K.C.)  
404 Crohn's & Colitis Foundation (K.C.)  
405 Kenneth Rainin Foundation (K.C.)  
406 Judith & Stewart Colton Center of Autoimmunity (K.C.)  
407 US National Cancer Institute (CA217809) (E.T.K.)  
408 K.C. is a Burroughs Wellcome Fund Investigator in the Pathogenesis of Infectious  
409 Diseases.

410 **Author contributions**

411 M.V., R.D., E.J.A.H, and K.C. conceived the study and designed the experiments. M.V.  
412 and R.D. performed, analyzed, and interpreted all the experiments for *T. muris* and *C.*  
413 *elegans*, respectively. D.J.L. performed the bacterial cloning. H.S.P and E.T.K provided  
414 DarkZone and technical advice. K.C., E.J.A.H, and J.G.B oversaw analysis and  
415 interpretation of all experiments described. M.V., R.D., E.J.A.H., and K.C. wrote the  
416 manuscript with inputs from all authors.

417

418 **Competing interests**

419 K.C. has received research support from Pfizer, Takeda, Pacific Biosciences,  
420 Genentech, and Abbvie. K.C. has consulted for or received honoraria from Puretech  
421 Health, Genentech, and Abbvie. K.C. holds U.S. patent 10,722,600 and provisional  
422 patent 62/935,035 and 63/157,225, and E.J.A.H. holds US patent 6,087,153.

423

424 **Data and materials availability**

425 All data needed to evaluate the conclusions in this study are available in the main text  
426 and the supplementary materials or available from the corresponding authors upon  
427 request.

428 **Supplementary Materials**

429 Materials and Methods

430 Figs. S1 to S7

431 Tables S1-S5

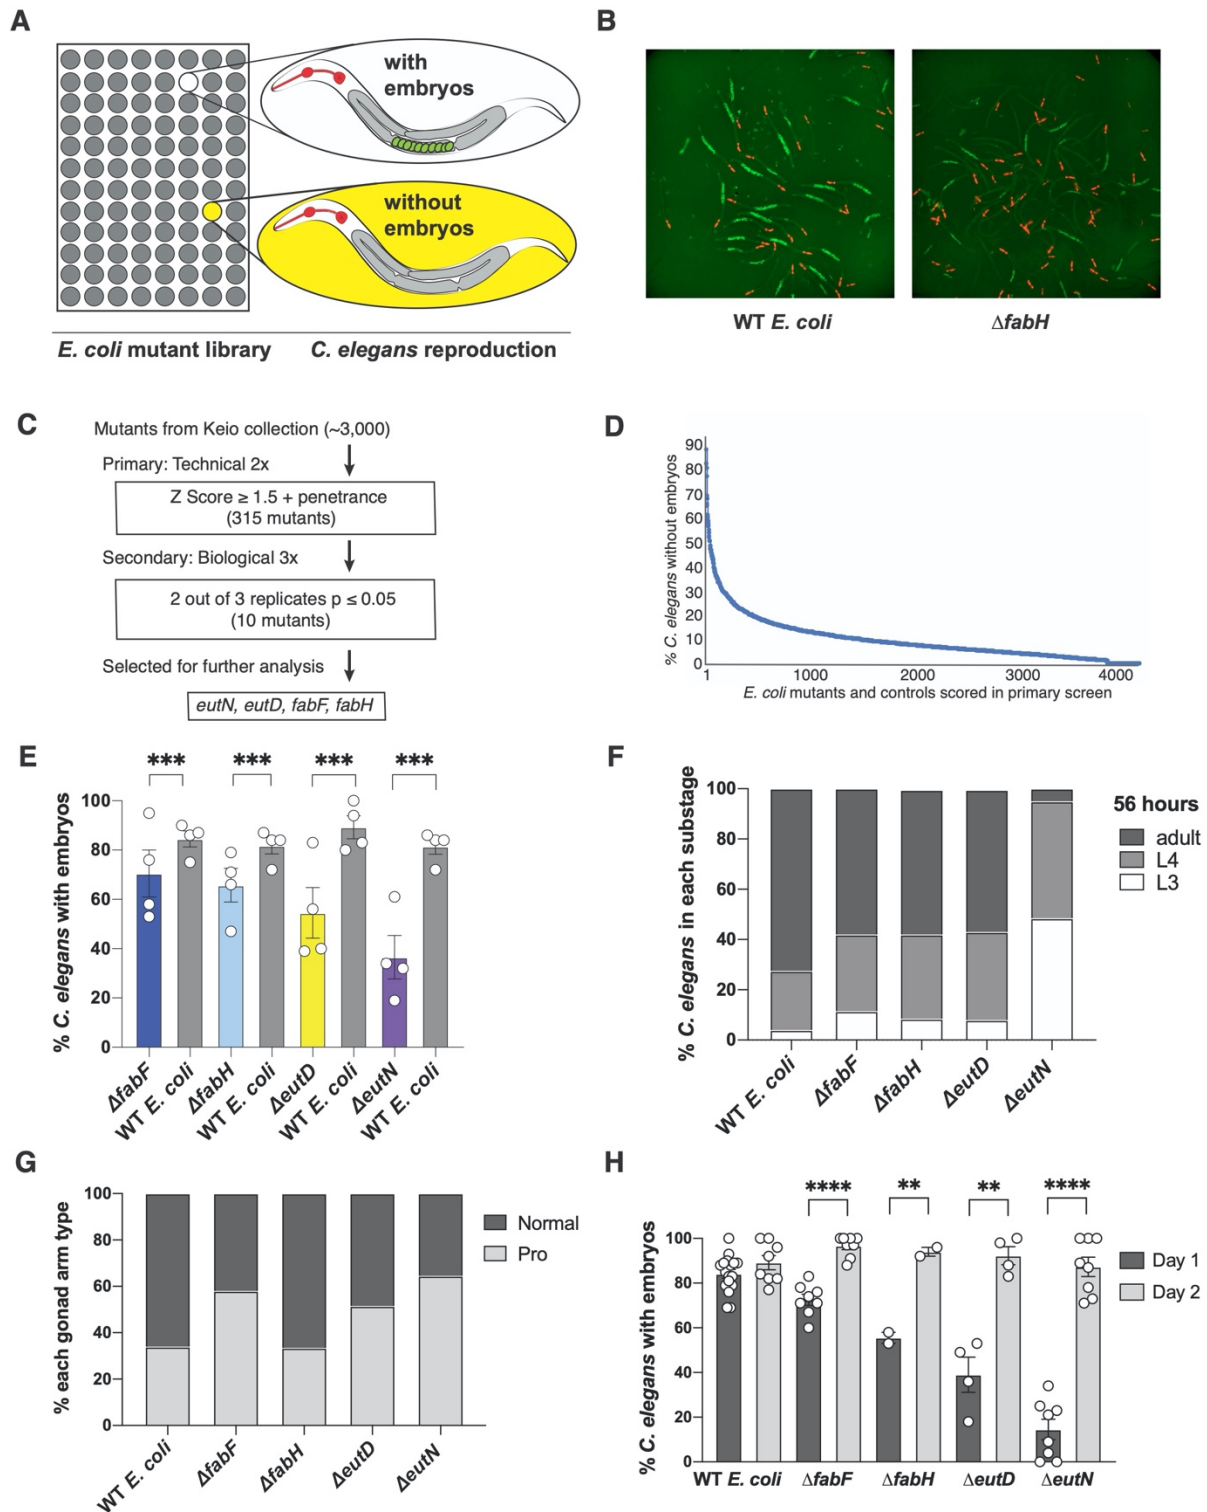

432

433 **Fig. 1 Identification of *E. coli* mutants that delay *C. elegans* fertility. (A) Concept of**

434 high throughput screening of *C. elegans* raised on *E. coli* mutants from the Keio library.

435 **(B)** Example of reduced penetrance of *C. elegans* bearing embryos at a single time-  
436 point; embryos marked with GFP and pharynx with mCherry. **(C)** Detailed flowchart for  
437 schematic in (A). **(D)** Raw primary screen results recorded as percentage of worms  
438 without embryos in each well. **(E)** Percentage of *C. elegans* bearing embryos in  
439 replicates of four *E. coli* mutants of interest from the screen. In each case,  $p \leq 0.001$  for  
440 each mutant versus its control from the same plates; total n number of worms scored  
441 are (left to right): 409, 923, 242, 387, 189, 522, 163, 501. **(F)** Somatic development is  
442 delayed in *C. elegans* raised on  $\Delta eutN$ . Percent of worms at indicated stage at 56 hours  
443 after L1 seeding to wells containing the control or mutant bacteria.  $n \geq 38$  worms were  
444 scored for each *E. coli* mutant.  $\Delta eutN$  is the only mutant that is statistically significantly  
445 different from the control GC1547 ( $p \leq 0.001$ ). n number of worms scored (left to right):  
446 52, 59, 61, 40, 54. **(G)**  $\Delta eutN$  and  $\Delta fabF$  delay germline development relative to somatic  
447 development. Percent of gonad arms displaying characteristic Pro phenotype.  $p \leq 0.001$   
448 for  $\Delta eutN$  and  $\Delta fabF$ . Pooled from two independent trials; n number of worms scored  
449 are (left to right): 87, 103, 79, 41, 61. **(H)** Fertility is delayed. Percent of worms with  
450 embryos on Day 1 and Day 2.  $p \geq 0.05$  (not significant) for any mutant versus the  
451 control on Day 2. n number of worms scored (left to right): 547, 297, 242, 242, 60, 46,  
452 124, 121, 253, 261. (D, G) Circles represent mean of each of independent biological  
453 replicate and bar is SEM; pairwise Fisher's exact test versus controls (D-F) or Day 1  
454 versus Day 2 (G). \*\*  $p < 0.01$ , \*\*\*  $p < 0.001$ , \*\*\*\*  $p < 0.0001$ .

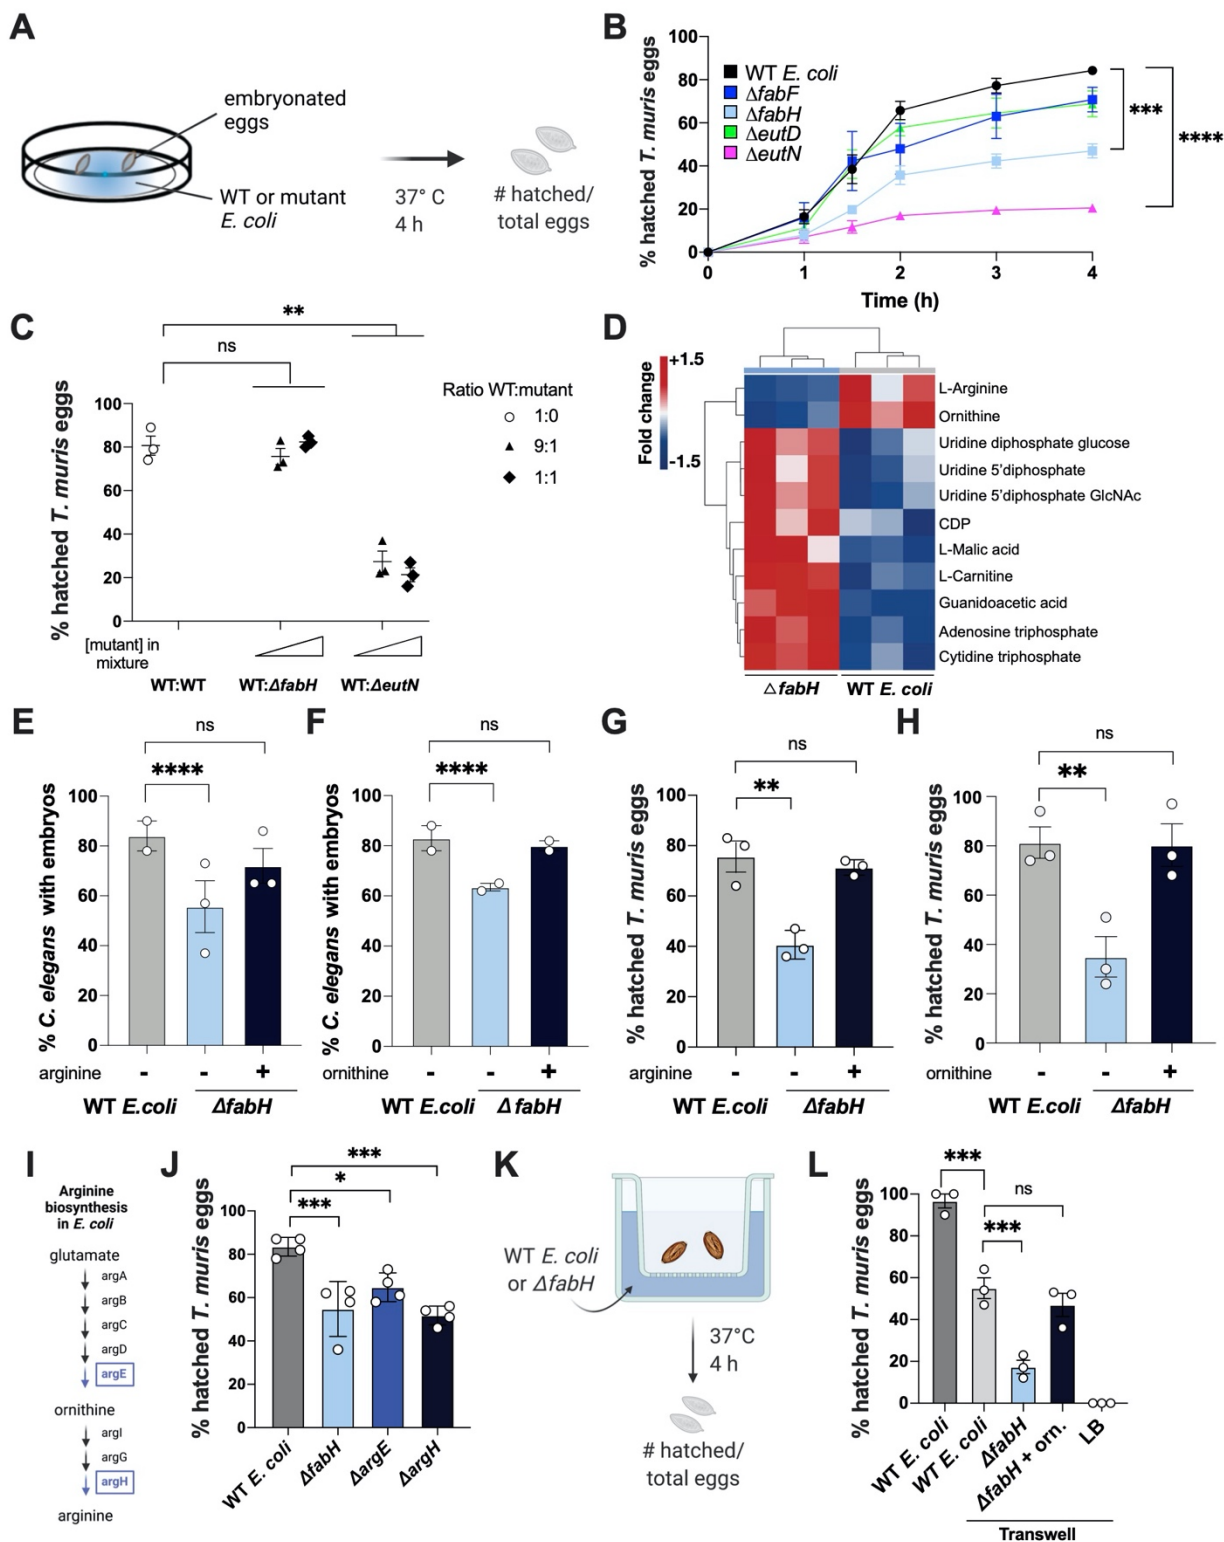

455

456 **Fig. 2 *E. coli* mutants with altered metabolic byproducts delay *C. elegans* fertility**

457 **and inhibit *T. muris* egg hatching. (A) Experimental approach for *in vitro* hatching**

458 assay. **(B)** Percent *in vitro* hatched *T. muris* eggs after incubation with overnight  
459 cultures of four *E. coli* mutants identified from the *C. elegans* screen or WT *E. coli*.  
460 Hatched eggs were checked using light microscopy at timepoints indicated (n = 4); h =  
461 hours. **(C)** Hatching rates for mixtures of WT *E. coli* and either  $\Delta fabH$  or  $\Delta eutN$  overnight  
462 cultures in the ratios indicated. Total concentration of each mixture was maintained at  
463  $1 \times 10^8$  CFU/mL (n = 3). **(D)** Hierarchical clustering of metabolites that were significantly  
464 ( $p < 0.05$ , Student's t-test) downregulated (blue) or upregulated (red) in  $\Delta fabH$  relative to  
465 WT. **(E, F)** Percentage of *C. elegans* Day 1 adults with embryos raised on  $\Delta fabH$  *E. coli*  
466 with arginine or ornithine supplementation. Fisher's exact test for  $\Delta fabH$  alone or with  
467 supplementation with 500 $\mu$ M arginine or 100 $\mu$ M ornithine compared to WT; Total n  
468 number of worms scored (left to right): **(E)** 208, 237, 300 and **(F)** 207, 216, 149. **(G, H)**  
469 Percent *in vitro* hatched *T. muris* eggs elicited by  $\Delta fabH$  and cultures supplemented with  
470 (G) 500 $\mu$ M arginine or (H) 70 $\mu$ M ornithine where indicated (n=3). **(I)** Arginine  
471 biosynthesis pathway in *E. coli*. **(J)** Hatching rates for  $\Delta argE$  and  $\Delta argH$  (n = 4). **(K)**  
472 Experimental approach for hatching assay in a transwell system. **(L)** Hatching quantified  
473 for eggs contained within a transwell chamber separated from bacterial culture in the  
474 outer chamber by a membrane with 0.4 $\mu$ m pores. Samples supplemented with ornithine  
475 as in H are indicated (n = 3). (B) One-way analysis of variance (ANOVA) of area under  
476 curve compared to WT. (C, G-H, J, L) One-way analysis of variance (ANOVA) with  
477 Dunnett's post-test compared to WT. For all panels, measurements were taken from  
478 distinct samples. Graphs show means and SEM. \*  $p < 0.05$ , \*\*  $p < 0.01$ , \*\*\*  $p < 0.001$ ,  
479 \*\*\*\*  $p < 0.0001$ . ns = not significant.

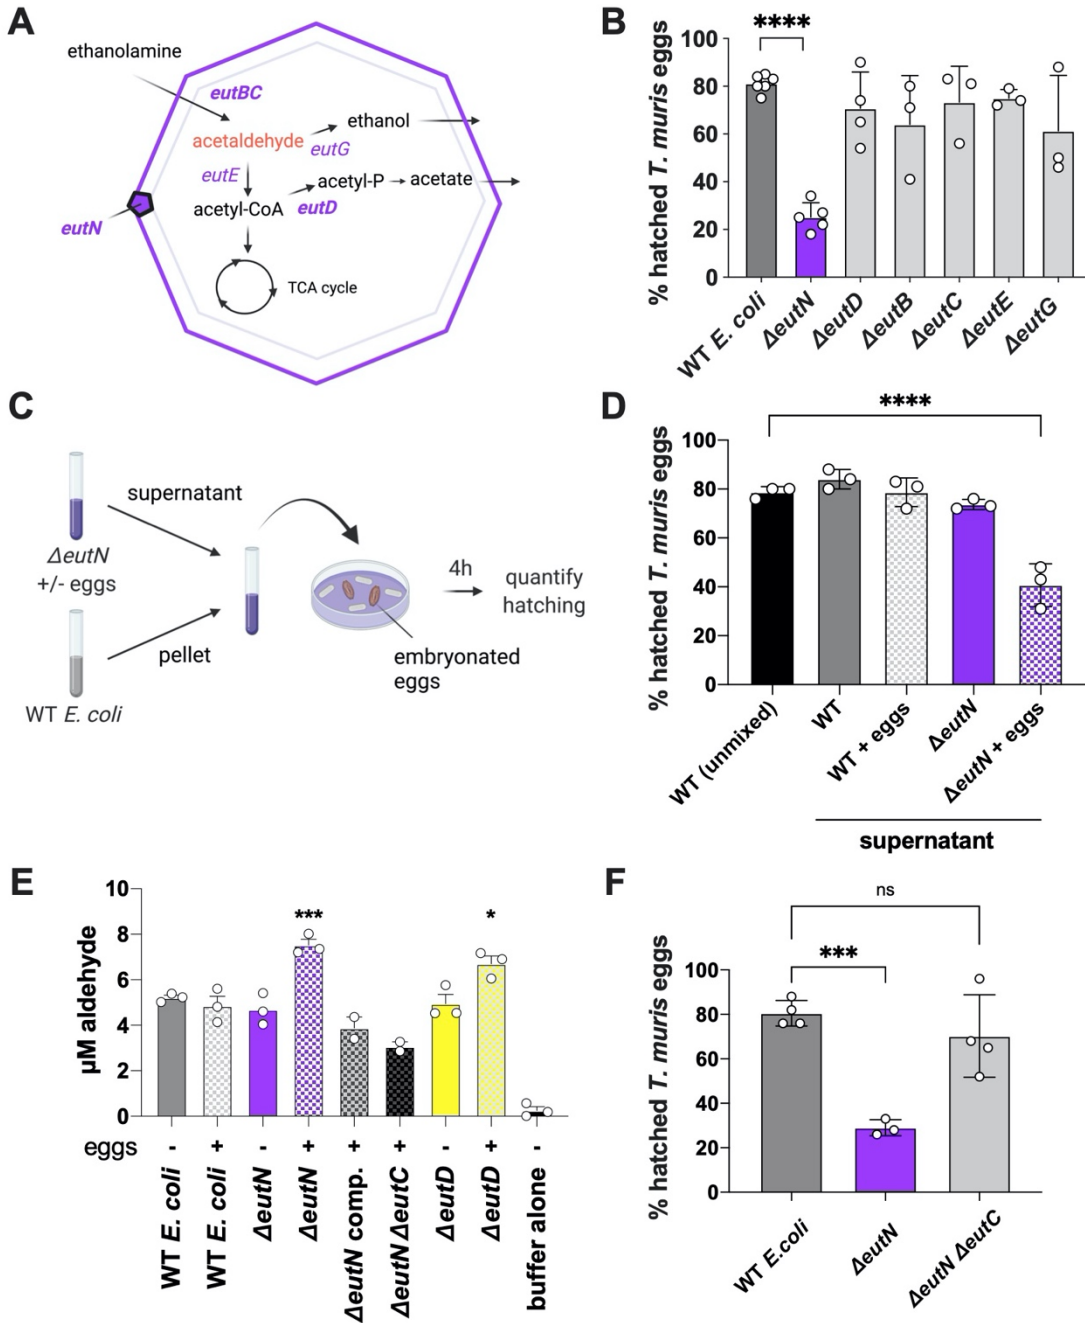

480

481 **Fig. 3 Toxic intermediates of the *E. coli* ethanolamine utilization pathway inhibit *T.***  
 482 ***muris* egg hatching. (A)** Ethanolamine utilization pathway in *E. coli*. Modified from  
 483 (36). **(B)** Hatching rates for *eut* mutants in the Keio library and WT controls (n = 3-6). **(C)**  
 484 Experimental approach to assess the toxicity of soluble factors produced by *E. coli*  
 485  $\Delta eutN$ . Filtered supernatant from  $\Delta eutN$  *E. coli* or controls grown with or without *T. muris*  
 486 eggs for four hours were transferred to a dish containing WT *E. coli* and *T. muris* eggs.

487 The ability of WT *E. coli* to mediate egg hatching in the presence of supernatant was  
488 examined four hours later. **(D)** Quantification of hatching rates in mixtures containing  
489 WT *E. coli* cells and the indicated filtered supernatants (n = 3). **(E)** Aldehyde  
490 concentrations in supernatants of indicated *E. coli* strains incubated with or without *T.*  
491 *muris* eggs;  $\Delta eutN$  comp. =  $\Delta eutN$  strain where *eutN* has been complemented on a  
492 plasmid. **(F)** Hatching rates for  $\Delta eutN\Delta eutC$  double mutant (n = 4). (B, D-F)  
493 Measurements were taken from distinct samples. The average per independent  
494 experiment for three technical replicates shown. Graphs show means and SEM. One-  
495 way analysis of variance (ANOVA) with Dunnett's post-test compared to WT. \* p < 0.05,  
496 \*\*\* p < 0.001, \*\*\*\* p < 0.0001. ns = not significant.



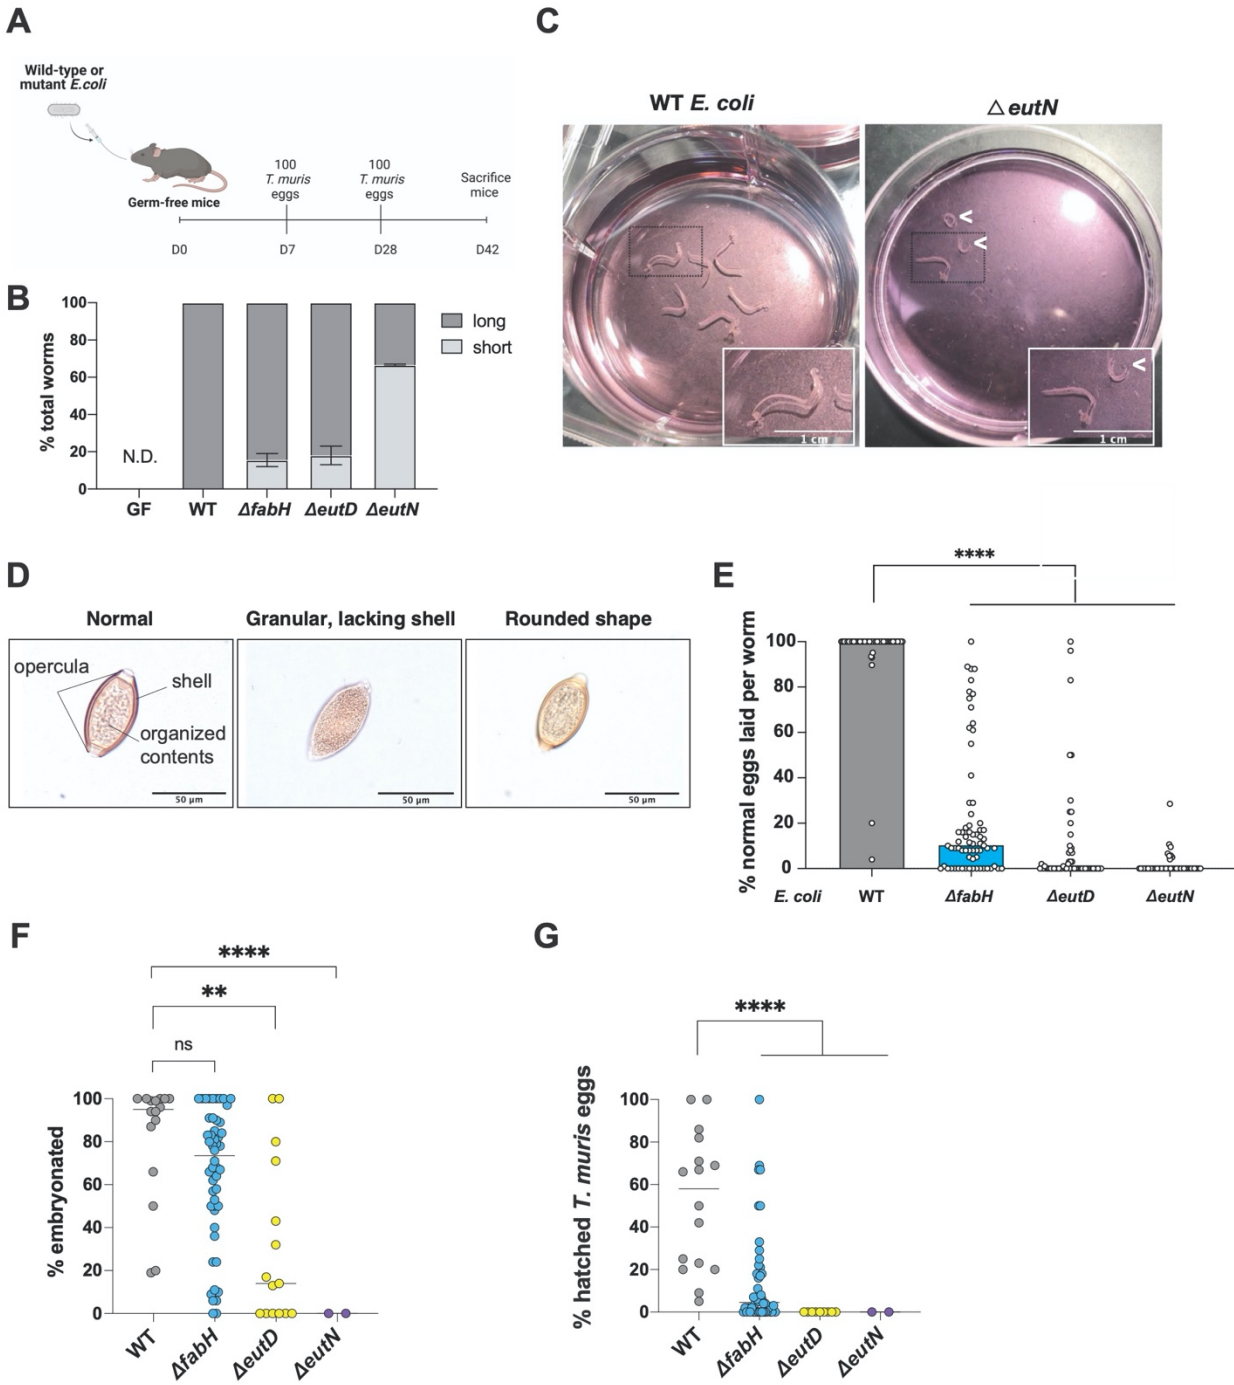

497

498 **Fig. 4 *T. muris* infection of mice colonized with *E. coli* mutants leads to defects in**

499 **worm morphology and fertility. (A)** Experimental approach for *T. muris* infection of

500 mice monocolonized with WT or mutant *E. coli*. **(B)** Proportion of short and long worms

501 harvested per mouse colonized by indicated *E. coli* strains; N.D. = not detected (n = 6-9

502 mice per group). **(C)** Representative images of worms harvested from mice  
503 monocolonized with WT or  $\Delta eutN$  *E. coli*. A representative short worm (indicated by  
504 arrowhead) next to a long worm is shown in the inset for  $\Delta eutN$  *E. coli*. **(D)**  
505 Representative images of eggs laid by worms from (B). Worms were incubated in RPMI  
506 medium overnight to trigger egg laying. **(E)** Proportion of total eggs laid per worm with  
507 normal morphology. Circles represent individual worms (WT, n = 46;  $\Delta fabH$ , n = 68;  
508  $\Delta eutD$ , n = 58;  $\Delta eutN$ , n = 50). **(F)** Percentage of embryonated eggs following 8-week  
509 incubation. **(G)** Percentage of eggs in (F) that hatched after incubation with WT *E. coli*  
510 for 4 hours at 37°C. (B, E, F-G) Measurements were taken from distinct samples. Data  
511 shown are pooled from two independent experiments. Graphs show (B) means and  
512 SEM or (E, F-G) medians. One-way analysis of variance (ANOVA) with Dunnett's post-  
513 test compared to WT. \*\* p < 0.01, \*\*\*\* p < 0.0001. ns = not significant.

514

## Supplementary Materials

### 515 **Materials and Methods**

516

#### 517 **Keio Library growth and culture**

518

519 The frozen Keio collection was stamped out onto 150mm LB kanamycin (30µg/ml)  
520 plates and grown overnight at 37°C. For *C. elegans* experiments, individual colonies  
521 were inoculated into 700 µl of LB-Kan (30µg/ml) in 96 deep well plates using a  
522 compatible pin replicator. The plates were sealed with pure link air porous tape  
523 (Invitrogen cat no. 12262010) and incubated for 16-18 hours at 37°C, shaking at 250  
524 rpm. Cultures were diluted 10X in S-media in 96 well format and OD at 600 nm was  
525 recorded for future reference to ensure that candidate positive mutants grew to an OD  
526 similar to the GC1547 wild-type control wells in the same plate. (This was done since  
527 poor bacterial growth can reduce the percentage of gravid *C. elegans*; all 315  
528 candidates from the primary screen passed this control). Bacterial cultures were  
529 pelleted by centrifugation at 2000 rpm for 30 minutes. Supernatant was discarded and  
530 the pellet was resuspended in 100µl of S-media. 40µl of the culture was transferred into  
531 two separate plates (two technical replicates; black-walled, clear bottom 96-well  
532 microplates; Corning Cat. No. 3904) using a multi-channel pipette. The GC1547 control  
533 wild-type strain was a kanamycin resistant transformant of the Keio library starting strain  
534 BW25113, carrying the pET28a plasmid. For *T. muris in vitro* hatching assays, *E. coli*  
535 was grown overnight for 12-14 hours in Luria-Bertani broth with shaking at 225 rpm at  
536 37 °C.

#### 537 **Primary screen**

538

539 *C. elegans* GC1474 (Table S1; derived by outcrossing GC1373 (23) of the genotype  
540 *glp-1(e2141); end-1::gfp; myo-2p::mCherry*) was maintained on OP50 *E. coli* on NGM  
541 plates at 20°C and synchronized in the L1 larval stage using hypochlorite treatment  
542 followed by overnight hatching in egg buffer (37). 40-50 L1 larvae were seeded into 96-  
543 well plates in technical duplicate with 40µl of *E. coli* mutant cultures and incubated at

544 20°C with mild shaking in a humidified chamber for 62-65 hours. At this timepoint,  
545 control worms were fully gravid adults; control GC1547 bacteria were included on each  
546 plate in wells void of library bacteria. Prior to imaging, 40µl of 2mM levamisole was  
547 added to each well to immobilize the worms. The plates were then sealed with  
548 aluminum foil (Corning Cat. No. 6570) and imaged to detect both green (embryos) and  
549 red (pharynx) fluorescent markers using arrayscan (Thermo Scientific VTI). Images  
550 were captured at 2.5X magnification 2x2 binning in a 16 mm<sup>2</sup> field and digitally archived.  
551 Images captured on the red and green channels were merged in ImageJ using macros  
552 written to automate the process. Each adult animal was scored visually as “with  
553 embryos” (green embryos visible in the uterus) or “without embryos” (no green embryos  
554 visible in the uterus), and the number of worms without embryos and the total number of  
555 worms (excluding any that were arrested or any that crossed the edge of the well).  
556 Wells in which many animals had not reached adulthood were marked and were not  
557 considered further in our analysis. Ten such bacterial mutants grew well by OD but did  
558 not support worm development.

559  
560 Additional culling of potential hits was performed. A variety of technical factors  
561 eliminated fewer than 10% of the total: 54 library wells were devoid of bacteria as per  
562 the plate map; 58 had a gene name in the library but the bacteria did not grow (either on  
563 solid or liquid culture); 41 were missed due to human error while scoring (noted as  
564 largely fertile but not counted individually); 5 had low n; 4 were not included due to  
565 reasons classified as ‘other’ (e.g., poor image) and 10 wells had poor worm growth in  
566 both replicates.

567  
568 Worm counts (with/without embryos) were exported into ActivityBase (IDBS,  
569 <https://www.idbs.com>; a Scientific informatics software platform) and the robust Z score  
570 (a statistical measure that takes into account the median plate “without embryos”  
571 percent) was calculated for every well to minimize problems associated with plate to  
572 plate variation. Each well was analyzed with respect to percent worms without embryos,  
573 consistency (across technical replicates) and robust Z score. A cut-off of robust Z ≥ 1.5  
574 was selected as “Z positive” (≤ 10% of the wells per plate scored above this threshold).

575 We also calculated the penetrance of worms without embryos for pooled technical  
576 replicates.

577  
578 Criteria for selection in the primary screen weighed the robust Z and penetrance, with  
579 special consideration for cases where only one replicate was available. We included  
580 those wells for which only one technical replicate was available provided that well made  
581 the RobZ cut off ( $\geq 1.5$ ) and/or percent non-gravid worms as further described below.  
582 Reasons for single-replicate included low n (62 wells), human error (49 wells), worm  
583 arrest (31 wells), poor image quality (22 wells) and 1 well marked as 'other'.  
584 Considering Z score, penetrance and replicates, the candidates were further classified  
585 as follows: High, A: both replicates Z positive and average penetrance of non-gravid  
586 worms  $> 20\%$ , or B: one replicate available and it is Z positive and  $> 20\%$ , or C: both  
587 replicates available but only one is Z positive and non-gravid  $\geq 30\%$ . Medium, A: both  
588 replicates Z positive and pooled non-gravid percent 13-20%, or B: only one replicate  
589 available which is Z positive and 13-20% penetrance of worms without embryos, or C:  
590 both replicates available but only one is Z positive with pooled non-gravid penetrance  
591 between 20-30%. Low: both replicates available, but only one is Z positive and non-  
592 gravid percent between 12.5-20%. This analysis yielded 315 primary screen candidates.

593  
594 We then plotted the percent non-gravid in descending order for every well per plate and  
595 noted the inflection point (see (23)). We placed a subset of the mutants that passed the  
596 criteria above onto these plots and observed a strong correlation: wells with larger Z  
597 scores all appeared above the inflection point.

598  
599 **Secondary screen: reproducibility**

600 The 315 candidates from the primary screen were re-selected from the original Keio  
601 library and gridded onto secondary screen plates. Two plates included only high priority  
602 candidates or a combination of randomly selected high, medium and low priority  
603 candidates to help assess whether there was a correlation between penetrance and  
604 reproducibility. No such correlation emerged, but these plates were considered as  
605 additional replicates in the analysis going forward (hence 6 plates) though 315 mutants.

606 Control bacteria were included in all secondary screen plates. Three biological  
607 replicates were performed in technical triplicate and scored and analyzed as described  
608 above. Technical replicate non-gravid/gravid counts were pooled and analyzed in  
609 pairwise comparison with the control on the same plates using Fisher's exact test.  
610 Candidates with p-values  $\leq 0.05$  in at least 2 out of 3 biological replicates were chosen  
611 for further analysis. This analysis yielded 10 candidates.

612

### 613 **PCR validation of selected Keio mutants (completed for all ten hits)**

614

615 We amplified and sequenced PCR fragments ~150 bp upstream and downstream of the  
616 predicted gene from each mutant and the control. Nested primers were used to  
617 sequence the PCR fragment and confirm the presence of the FRT and kanamycin  
618 cassette in the mutant DNA (Tables S3, S5).

619

### 620 **P1 transduction**

621

622 Mutant alleles comprising a kanamycin-resistance marker within a gene deletion were  
623 introduced into BW25113 by P1 transduction (38) from the Keio collection (39). The  
624 kanamycin-resistance cassette was subsequently excised to generate a markerless in-  
625 frame gene deletion by transformation with the temperature-sensitive plasmid pCP20  
626 (40), which encodes FLP recombinase, and growth at 30°C. Finally, pCP20 was  
627 eliminated from the cells by growth at 42°C.

628

### 629 **Complementation**

630

631 For *fabH* and *eutN*, the bacterial gene coding regions plus 20 bp upstream were  
632 inserted into pBR322 downstream of a plasmid promoter by Gibson Assembly. The  
633 wild-type genomic DNA was amplified and assembled with a PCR fragment obtained  
634 from the pBR322 vector (specific primers are listed in Table S3; the fragment excluded  
635 part of the Amp<sup>R</sup> gene between *EcoRI* and *PstI* restriction site). PCR products were  
636 purified using gel extraction kit (QIAEX II cat no. 20021) and 100 ng of vector was used

637 in 1:1 molar reaction with the genomic fragment. The assembly reaction was then  
638 transformed into high efficiency DH5alpha cells (NEB C29871). Plasmid preparations  
639 (Qiagen mini prep kit Cat no.27106) were sequenced using pBR322 specific primers  
640 (Table S4). Plasmids were confirmed by DNA sequence and transformed into the  
641 respective mutant (named as strains GC1558 and GC1559 for *eutN* rescue and *fabH*  
642 rescue, respectively) and tested for reduced penetrance of the *C. elegans* non-gravid  
643 phenotype upon feeding.

644

## 645 **Developmental timing and germline analysis**

646

### 647 *Somatic development assay*

648 *C. elegans* were maintained on OP50, synchronized by hypochlorite treatment and  
649 allowed to hatch at 20°C with shaking. 30-40 L1 larvae were seeded in 96 deep well  
650 plates with each well carrying a specific mutant clone. Worms were incubated at 20°C  
651 with shaking for 48 hours and monitored at 400X on a Zeiss Z1 Axio Imager for vulval  
652 morphology (24) at specific time points.

653

### 654 *Pro phenotype assay*

655 *glp-1(ar202)* animals were scored for the Pro phenotype upon feeding with mutant  
656 bacteria using the same strategy as for the primary screen. Worms were maintained at  
657 15°C on OP50 synchronized and grown in 96 deep well format as above. Day 1 (~72  
658 hours post seeding) worms were fixed and DAPI stained and each gonad arm was  
659 scored for the Pro phenotype (25) at 400X.

660

### 661 *Fertility at Day 2*

662 GC1474 worms were maintained at 20°C on OP50, synchronized as L1 larvae and  
663 grown in 96 deep well format as above. Worms were anesthetized and imaged as in the  
664 screen on Day 1 and Day 2 to determine changes in penetrance of fertile worms.

665

### 666 *Progenitor zone nuclei counts at L4-Adult molt*

667 Worms grown on GC1547 control, *eutN*, *eutD*, and *fabH* mutant bacteria were  
668 monitored for vulval development and isolated at the L4-adult molt. Worms were then  
669 stained with DAPI (22) and 0.5 $\mu$ m Z-stack images were collected and analyzed using  
670 ImageJ to determine the number of germ cells in the PZ. In approximately 30% of the  
671 worms, the transition zone was not clear. These were censored from the analysis.

672

673 *Assay for dependence on DAF-7/TGF $\beta$  and DAF-2 IIS pathways*

674 *C. elegans* strains GC1474, GC1545 and GC1250 (Table S2) were hypochlorite-  
675 synchronized and hatched overnight at 20°C. L1 larvae were seeded into 96 deep well  
676 plates containing specific bacterial mutants and scored for the presence of embryos in  
677 adults on Day 1 on Zeiss compound microscope at 100X.

678

679 **Parasite maintenance**

680

681 Stock eggs of *T. muris* E strain (7) were maintained in the NOD.Cg-*Prkdc*<sup>scid</sup>/J (Jax)  
682 mouse strain in a specific pathogen free (SPF) facility and propagated as previously  
683 described (41). Each egg batch was confirmed to hatch at  $\geq 80\%$  *in vitro* using method  
684 below and WT *E. coli* before use in subsequent experiments.

685

686 ***In vitro* hatching of *T. muris* eggs**

687

688 *T. muris* eggs were hatched *in vitro* by mixing 25 $\mu$ L of embryonated eggs at a  
689 concentration of 1 egg/1 $\mu$ L suspended in sterile water with 10 $\mu$ L of *E. coli* overnight  
690 culture and 15 $\mu$ L sterile LB in individual wells of a 48 well plate. Plates were incubated  
691 at 37°C and checked every hour for a total of four hours on the Zeiss Primovert  
692 microscope to enumerate hatched eggs. Rates describe hatching after four hours of  
693 incubation unless otherwise indicated. Experiments utilizing transwell inserts (Millicell)  
694 were performed as previously described (5). For experiments where cell-free  
695 supernatant was used, supernatant and cells were isolated by centrifugation and  
696 filtration through a 0.22 $\mu$ m syringe filter or after wash with autoclaved ddH<sub>2</sub>O,



697 respectively. Incubation with embryonated eggs was performed by mixing *T. muris* eggs  
698 at a concentration of 15 eggs/2 mL culture and keeping at 37°C for four hours.

699

## 700 **Metabolomics**

### 701 *Sample preparation*

702 Individual colonies (obtained after streaking frozen bacteria onto LB-kanamycin plates  
703 and incubating at 37°C) were inoculated in 30 ml of LB-kanamycin (30µg/ml) liquid in a  
704 50ml falcon tube. Cultures were grown for 16-18hr at 37°C with 250 rpm shaking and  
705 then bacteria were pelleted by centrifugation at 1500 rpm for 20-30 minutes at 4°C. The  
706 supernatant was transferred to a fresh tube, filtered through 0.2µm filter (Corning  
707 (431229) and frozen at -80°C for future analysis. Pellets were resuspended in 7.5 ml of  
708 S-media (for ~250ml of S-media the recipe was 240ml of S-basal, 2.5ml of 1M  
709 potassium citrate- final concentration of 10mM, 2.5ml of 1M trace metals for final  
710 concentration of 10mM, 750µl of 1M MgSO<sub>4</sub> for final concentration of 3mM, 750µl of 1M  
711 CaCl<sub>2</sub> for final concentration of 3mM, 72µl of 100mg/ml of kanamycin for final  
712 concentration of 30µg/ml). This solution was filter sterilized using a 500ml Nalgene filter  
713 (291-3320 Fisher). Post filter sterilization, 250µl of 5mg/ml cholesterol – final  
714 concentration of 5µg/ml and 2.5ml of 250µg/ml fungizone for final concentration of  
715 2.5µg/ml (BP264550 Fisher).

716

717 The number of CFU/ml was estimated for each culture by plating dilutions (10µl of  
718 culture was mixed with 900µl of S-media to get 10<sup>2</sup> or 1:100 dilution, which was then  
719 serially diluted to 1:10<sup>5</sup> or 1:10<sup>6</sup> on LB agar plates and counting colonies after growth at  
720 37°C. The remaining culture was incubated at 20°C with mild shaking overnight to  
721 mimic *C. elegans* growth conditions. Based on CFU/ml measurements, 10<sup>10</sup> cells were  
722 fast filtered (EZFIT Vacuum Manifold, Millipore EZFITLOW03 with Microfil V, Millipore  
723 MVHAWG124) and metabolite extracts were isolated as previously described (42).  
724 Three independent biological samples were extracted on three independent days and  
725 subsequently analyzed by the NYU Langone Metabolomics Core Resource Library.

## 726 *LC-MS/MS with the hybrid metabolomics method*

727 Samples were subjected to an LCMS analysis to detect and quantify known peaks. A  
728 metabolite extraction was carried out on each sample based on a previously described  
729 method (43). The LC column was a Millipore<sup>TM</sup> ZIC-pHILIC (2.1 x150mm, 5µm)  
730 coupled to a Dionex Ultimate 3000<sup>TM</sup> system and the column oven temperature was  
731 set to 25°C for the gradient elution. A flow rate of 100µL/min was used with the  
732 following buffers: A) 10mM ammonium carbonate in water, pH 9.0, and B) neat  
733 acetonitrile. The gradient profile was as follows; 80-20%B (0-30 min), 20-80%B (30-31  
734 min), 80-80%B (31-42 min). Injection volume was set to 2µL for all analyses (42 min  
735 total run time per injection).

736 MS analyses were carried out by coupling the LC system to a Thermo Q Exactive  
737 HF<sup>TM</sup> mass spectrometer operating in heated electrospray ionization mode (HESI).  
738 Method duration was 30 min with a polarity switching data-dependent Top 5 method for  
739 both positive and negative modes. Spray voltage for both positive and negative modes  
740 was 3.5kV and capillary temperature was set to 320°C with a sheath gas rate of 35, aux  
741 gas of 10, and max spray current of 100µA. The full MS scan for both polarities utilized  
742 120,000 resolution with an AGC target of 3e6 and a maximum IT of 100ms, and the  
743 scan range was from 67-1000 *m/z*. Tandem MS spectra for both positive and negative  
744 mode used a resolution of 15,000, AGC target of 1e5, maximum IT of 50ms, isolation  
745 window of 0.4*m/z*, isolation offset of 0.1*m/z*, fixed first mass of 50*m/z*, and 3-way  
746 multiplexed normalized collision energies (nCE) of 10, 35, 80. The minimum AGC target  
747 was 1e4 with an intensity threshold of 2e5. All data were acquired in profile mode.

## 748 **Hybrid Metabolomics Data Processing**

### 749 *Relative quantification of metabolites*

750 The resulting Thermo<sup>TM</sup> RAW files were converted to mzXML format using ReAdW.exe  
751 version 4.3.1 to enable peak detection and quantification. The centroided data were  
752 searched using an in-house python script Mighty\_skeleton version 0.0.2 and peak

753 heights were extracted from the mzXML files based on a previously established library  
754 of metabolite retention times and accurate masses adapted from the Whitehead  
755 Institute (44), and verified with authentic standards and/or high resolution MS/MS  
756 spectral manually curated against the NIST14MS/MS (45) and METLIN (2017)(46)  
757 tandem mass spectral libraries. Metabolite peaks were extracted based on the  
758 theoretical  $m/z$  of the expected ion type e.g.,  $[M+H]^+$ , with a  $\pm 5$  part-per-million (ppm)  
759 tolerance, and a  $\pm 7.5$  second peak apex retention time tolerance within an initial  
760 retention time search window of  $\pm 0.5$  min across the study samples. The resulting data  
761 matrix of metabolite intensities for all samples and blank controls was processed with an  
762 in-house statistical pipeline Metabolize version 1.0 and final peak detection was  
763 calculated based on a signal to noise ratio (S/N) of 3X compared to blank controls, with  
764 a floor of 10,000 (arbitrary units). For samples where the peak intensity was lower than  
765 the blank threshold, metabolites were annotated as not detected, and the threshold  
766 value was imputed for any statistical comparisons to enable an estimate of the fold  
767 change as applicable. The resulting blank corrected data matrix was then used for all  
768 group-wise comparisons, and t-tests were performed with the Python SciPy (1.1.0) (47)  
769 library to test for differences and generate statistics for downstream analyses. Any  
770 metabolite with p-value  $< 0.05$  was considered significantly regulated (up or down).  
771 Heatmaps were generated with hierarchical clustering performed on the imputed matrix  
772 values utilizing the R library pheatmap (1.0.12) (48). Volcano plots were generated  
773 utilizing the R library, Manhatanly (0.2.0). In order to adjust for significant covariate  
774 effects (as applicable) in the experimental design the R package, DESeq2 (1.24.0) (49)  
775 was used to test for significant differences. Data processing for this correction required  
776 the blank corrected matrix to be imputed with zeroes for non-detected values instead of  
777 the blank threshold to avoid false positives. This corrected matrix was then analyzed  
778 utilizing DESeq2 to calculate the adjusted p-value in the covariate model.

### 779 **Arginine and ornithine supplementation assay**

780 *fabH* mutant *E. coli* or wild-type control was grown with arginine (400 $\mu$ M or 500 $\mu$ M) or  
781 ornithine (40-100mM) in LB-kanamycin overnight at 37°C with 250 rpm shaking. For C.

782 *elegans* experiments, worms were imaged on Day 1 as described for the primary  
783 screen. For *T. muris* experiments, hatching assay was performed as described above.

784

#### 785 **DarkZone labeling of aldehydes**

786 Cell-free supernatants isolated from *E. coli* overnight cultures were incubated with 20 $\mu$ M  
787 DarkZone dye pre-dissolved in DMSO, 5mM 2,4 dimethoxyaniline catalyst (TCI  
788 America) pre-dissolved in DMSO, and buffer (100mM Tris pH 6.8, 150 mM NaCl) in a  
789 96 well optical flat-bottom plate (Thermo-Fisher) in duplicate at 37°C for 1 hour.  
790 Adhesive plate seals were used to prevent evaporation of aldehydes. Fluorescence was  
791 measured using an EnVision 2 103 Multi-label Reader (PerkinElmer). Duplicate  
792 measurements were averaged.

#### 793 **Mice**

##### 794 *Gnotobiotics*

795 Previously described germ-free C57BL/6J mice (50) were maintained in flexible film  
796 isolators, and absence of faecal bacteria and fungi was confirmed by aerobic culture in  
797 brain heart infusion, sabaraud and nutrient broth (Sigma), and qPCR for bacterial 16S  
798 and eukaryotic 18S ribosomal RNA genes through sampling of stool from individual  
799 cages in each isolator on a monthly basis. Mice were transferred into individually  
800 ventilated Tecniplast ISOcages for infections to maintain sterility under positive air  
801 pressure. All animal studies were performed according to approved protocols and  
802 ethical guidelines established by the NYU Grossman School of Medicine Institutional  
803 Animal Care and Use Committee (IACUC) and Institutional Review Board.

##### 804 *Murine in vivo infections*

805 Female mice were monocolonized at 6-8 weeks of age by oral gavage with  $1 \times 10^8$   
806 colony forming units per mL (CFU/mL) of indicated *E. coli* strains. Overnight *E.*  
807 *coli* cultures were diluted 1:100 in Luria-Bertani broth followed by 2-3 hours of growth  
808 until  $1 \times 10^8$  CFU/mL was reached. Bacterial density was confirmed by dilution plating.

809 Cultures were pelleted by centrifugation at 2437g for 10 minutes and washed once with  
810 sterile 1x PBS. Pellets were then resuspended in sterile 1x PBS and mice were  
811 inoculated by oral gavage with  $1 \times 10^8$  CFU in a volume of 100 $\mu$ L. Inoculum was verified  
812 using dilution plating of aliquots.

813 7 and 28 days later, mice were infected by oral gavage with ~100 embryonated *T. muris*  
814 eggs. Individual worms were collected from cecal contents of all infected mice and  
815 washed in RPMI 1640 (Invitrogen) supplemented with penicillin (100U/ml) and  
816 streptomycin (100 $\mu$ g/ml; Sigma). To evaluate egg laying, each worm was placed into  
817 individual wells of a 48 well plate with 200 $\mu$ L supplemented RPMI. Plates were then  
818 incubated at 37°C overnight in a closed tupperware (Sistema) lined with damp paper  
819 towels. The following day, eggs laid were enumerated using a Zeiss Primovert light  
820 microscope at 100X. Samples containing ~1000 eggs per condition were mounted on  
821 glass slides with glycerol mounting medium (Sigma-Aldrich) and analyzed using a Zeiss  
822 Axio Observer at 400X with oil emersion for color images or EVOS FL Auto (Life  
823 Technologies) at 200X for black and white images. Images were processed using  
824 ImageJ.

825

## 826 **Statistical analysis**

827 Statistical tests and parameters used, including the definition of central value and the  
828 exact number (n) of mice or worms per group, are annotated in the corresponding figure  
829 legend. All analyses were performed with Graphpad Prism version 8.4.3 for Mac  
830 (GraphPad). The numbers of animals or biological replicates used herein were  
831 estimated on the basis of a power analysis with the following assumptions: the standard  
832 deviation will be roughly 20% of the mean; *p* values will be less than 0.05 when the null  
833 hypothesis is false; and the effect size (Cohen's *d*) is between 1.0 and 2.0. We have  
834 also carefully chosen the indicated sample size on the basis of empirical evidence of  
835 what is necessary to interpret the data and statistical significance.

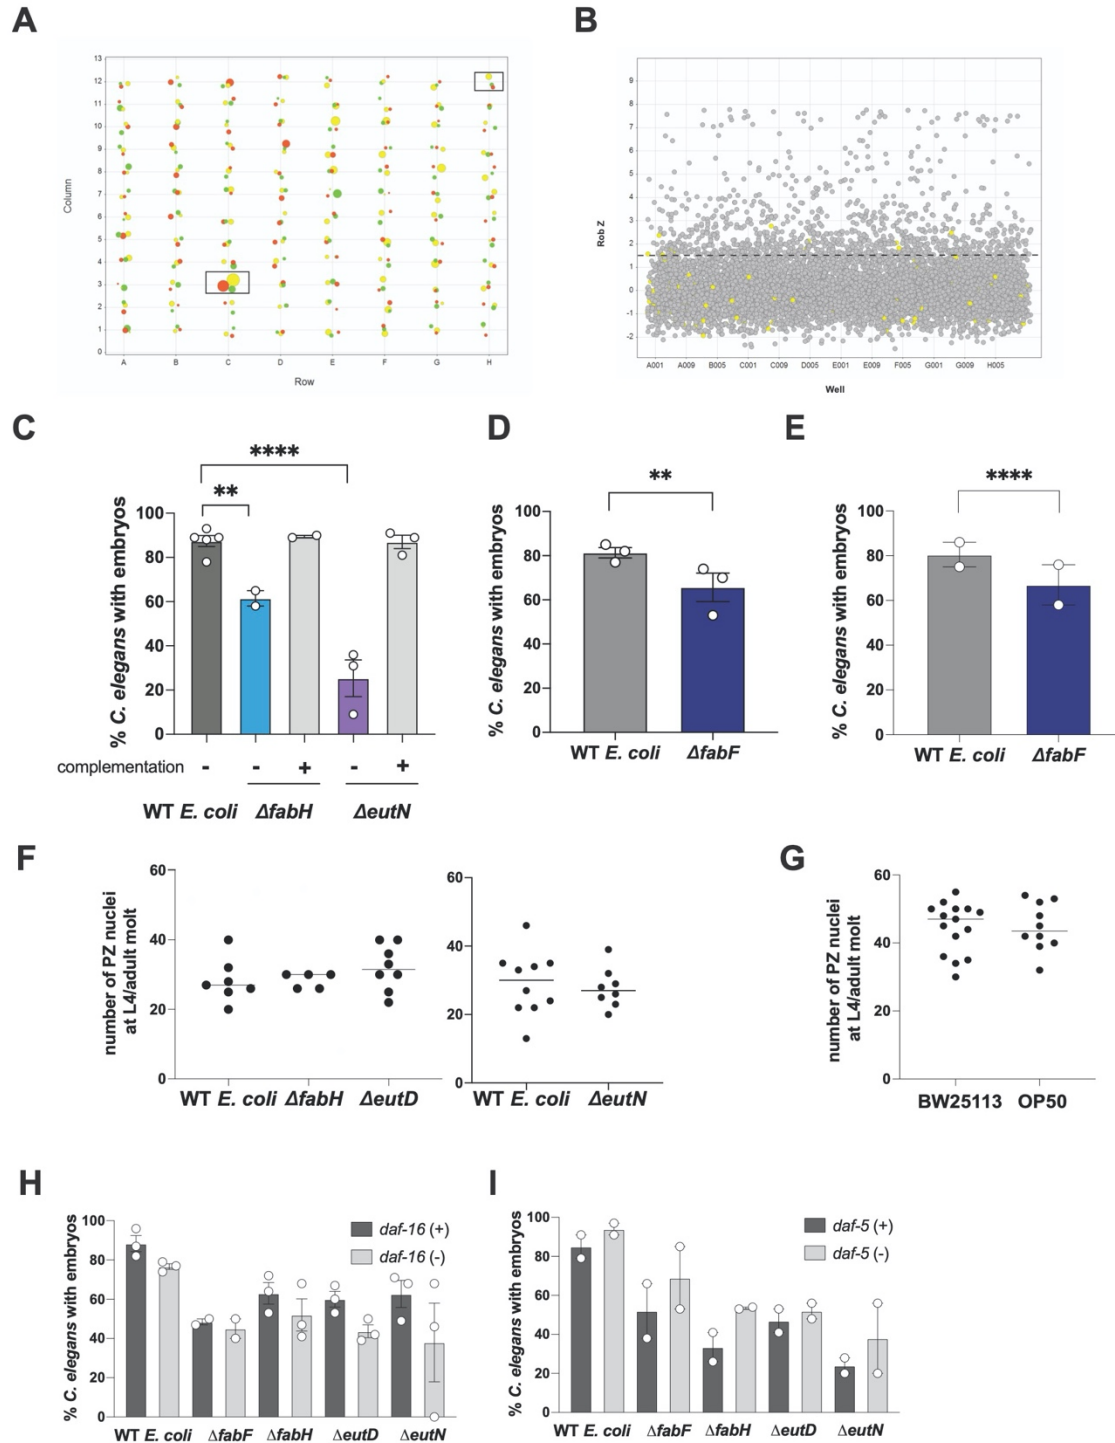

836

837 **Fig. S1 Primary screen selection criteria, validation of *E. coli* mutants, and effect**

838 **of mutant *E. coli* on *C. elegans*. (A) Representative bubble plot from secondary**

839 **screen replicates. One of the six 96-well plates used in the secondary screen is shown**

840 **here rendered using Vortex software data visualization tool. The size of the bubble**

841 represents percent of worms without embryos that is calculated from three technical  
842 replicates, while the color indicates the three biological trials. Boxed wells H12 and C3  
843 indicate the negative control and a positive hit in two out of three replicates based on  
844 statistical tests (see Methods). **(B)** Scatter plot showing the Robust Z (Rob Z) score for  
845 all primary screen wells scored. Scatter plot was generated using Vortex dotmatics  
846 software. Yellow dots indicate wells containing the negative control bacteria (GC1547).  
847 Dashed line indicates cut-off for Rob Z criterion. **(C)**  $\Delta eutN$  and  $\Delta fabH$  complementation  
848 suppresses *C. elegans* fertility defect.  $p \leq 0.0001$  by Fisher's exact test compared to  
849 WT; n total number of worms scored in each case is (left to right): 925, 220, 197, 744,  
850 1078. **(D, E)**  $\Delta fabF$  phage transductants mimic *C. elegans* fertility defect of  $\Delta fabF$   
851 original clone. Circles represent mean of four independent biological replicates and bar  
852 is SEM. (D)  $p \leq 0.007$  for original *fabF* clone (n = 330, 214 worms scored in WT and  
853  $\Delta fabF$ , respectively), and (E)  $p \leq 5 \times 10^{-5}$  (n = 231, 66), Fisher's exact test, compared to  
854 control GC1547 bacteria in each case. **(F)** The number of progenitor zone nuclei of *glp-*  
855 *1(e2141)* at the L4 to Adult molt is not altered in worms raised on  $\Delta eutN$ ,  $\Delta fabH$  or  
856  $\Delta eutD$  versus wild-type *E. coli*. Scatter plots showing number of progenitor zone germ  
857 cell counts; each dot represents one gonad arm. We noted that in ~30% of *eutN*  
858 mutants (relative to 10% in control), the border of the PZ was difficult to detect; these  
859 were censored from PZ counts. The elevated penetrance of this phenotype in the  
860  $\Delta eutN$ -fed worms may represent a meiotic entry defect, accounting for the delay in  
861 germline development relative to somatic development. **(G)** No significant difference is  
862 observed between the number of progenitors in worms grown on BW25113 versus  
863 OP50 on standard NGM solid media ( $p \geq 0.05$ , Student's t-test). We note that the  
864 number of progenitors is markedly lower in the *glp-1(e2141)* mutant background after  
865 growth on liquid versus growth on solid media; the Keio starting strain was used in (G)  
866 since OP50 is sensitive to kanamycin. **(H, I)** Fertility delay is not suppressed by loss of  
867 *daf-16* or *daf-5*. Percent of worms with embryos on Day 1 in (H) *daf-16(+); daf-2(e1370)*  
868 *glp-1(e2141)* or *daf-16(m26); daf-2(e1370) glp-1(e2141)* and (I) *daf-5(+); glp-1(e2141)*  
869 or *daf-5(e1386); glp-1(e2141)*. Although a significant difference was detected by  
870 Fisher's exact test between *daf-5(+)* and *daf-5(-)* for  $\Delta eutN$  ( $p < 0.0001$ ) and  $\Delta fabH$  ( $p <$   
871  $0.0001$ ), this was not considered biologically meaningful since the *daf-5(e1386)* worms

872 raised on GC1547 bore significantly more embryos in comparison to the *daf-5(+)* worms  
873 raised on the GC1547 control ( $p \leq 0.0027$ ). Circles represent mean of independent  
874 biological replicates and bar is SEM. n total number of worms scored are (left to right):  
875 **(I)** 269, 203, 207, 245, 179, 255, 229, 214, 200, 233 and **(J)** 59, 65, 71, 62, 179, 73, 64,  
876 54, 56, 57.



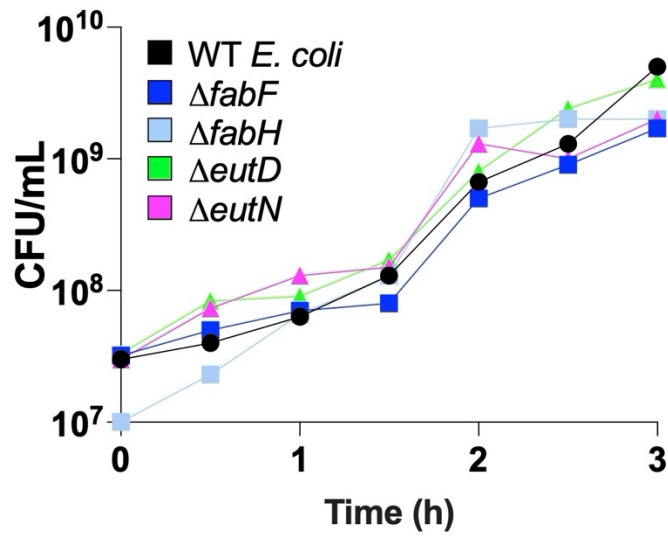

877

878 **Fig. S2 *E. coli* mutants used for *T. muris* egg hatching assay display similar *in***  
879 ***vitro* growth kinetics as wild-type bacteria.**

880 Bacterial density of monoclonal cultures of each of the strains indicated measured by  
881 dilution plating; CFU = colony forming units, h = hours.

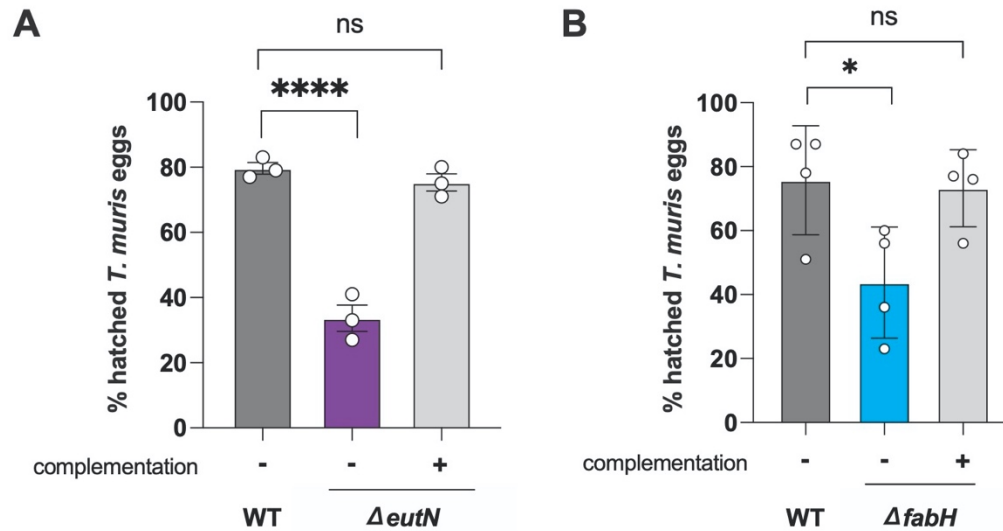

882

883 **Fig. S3 Complementation of  $\Delta$ *fabH* and  $\Delta$ *eutN* *E. coli* rescue *T. muris* egg**  
884 **hatching.**

885 Hatching elicited by WT *E. coli* (WT), mutants **(A)**  $\Delta$ *eutN* and **(B)**  $\Delta$ *fabH*, and strains  
886 where deletions were complemented with a plasmid-borne gene (n = 3-4).

887 Measurements were taken from distinct samples. Data represent the average of at least  
888 three independent experiments. Graphs show means and SEM. One-way analysis of  
889 variance (ANOVA) with Dunnett's post-test compared with WT. \* p < 0.05, \*\*\*\* p <  
890 0.0001. ns = not significant.

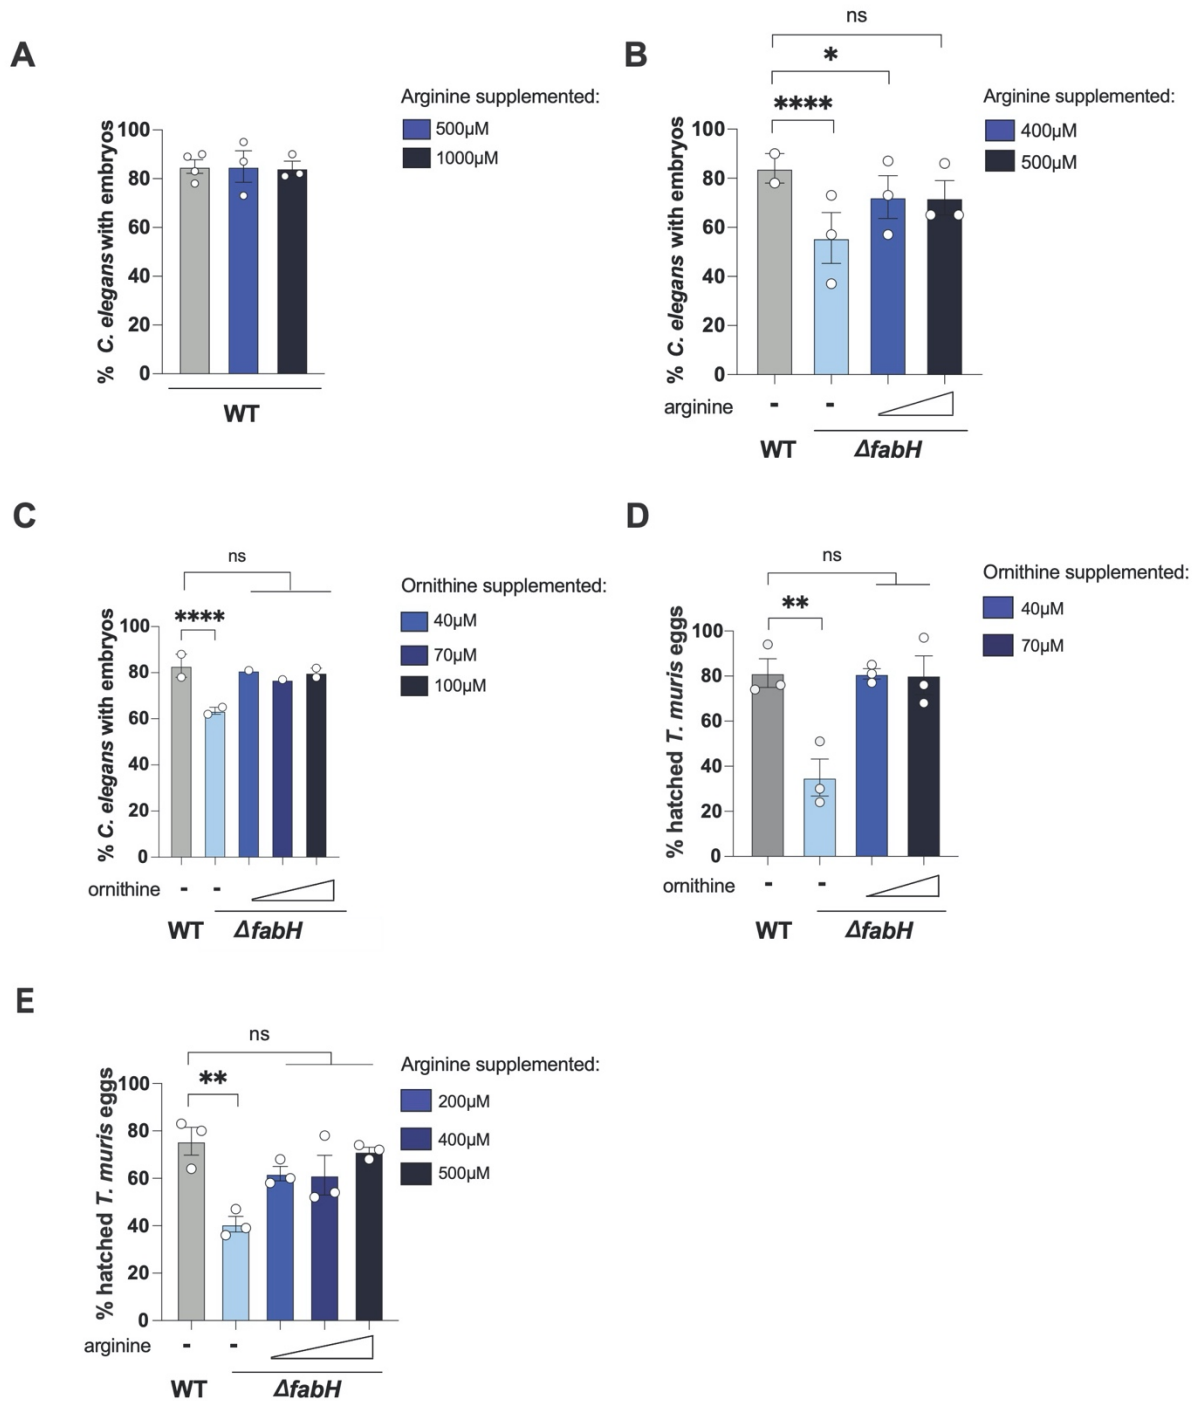

891

892 **Fig. S4 Ornithine or arginine supplementation of  $\Delta fabH$  *E. coli* rescues defects in**

893 ***C. elegans* and *T. muris*, related to Fig. 2. (A-C) Percentage of *C. elegans* Day 1**

894 **adults with embryos; WT = WT *E. coli*. (A) Arginine supplementation does not alter**

895 baseline penetrance of *C. elegans* with embryos in *glp-1(e2141)*. Total n worms scored  
896 (left to right): 173, 118, 108. **(B-C)** Reproduction of Fig. 2, E-F with additional  
897 concentrations of (B) arginine and (C) ornithine. Total n worms scored (left to right) for  
898 (B) are 208, 237, 200, 300 and (C) 207, 216, 39, 20,149; p values calculated by Fisher's  
899 exact test. **(D-E)** Reproduction of Fig. 2, G-H with additional concentrations of (D)  
900 ornithine and (E) arginine. Percent *in vitro* hatched *T. muris* eggs elicited by *E. coli*  
901 cultures indicated (n=3). One-way analysis of variance (ANOVA) with Dunnett's post-  
902 test compared with WT. For all panels, measurements were taken from distinct  
903 samples. The average per independent experiment for two to three technical replicates  
904 shown. Graphs show means and SEM. \* p < 0.05, \*\* p < 0.01, \*\*\*\* p < 0.0001. ns = not  
905 significant.

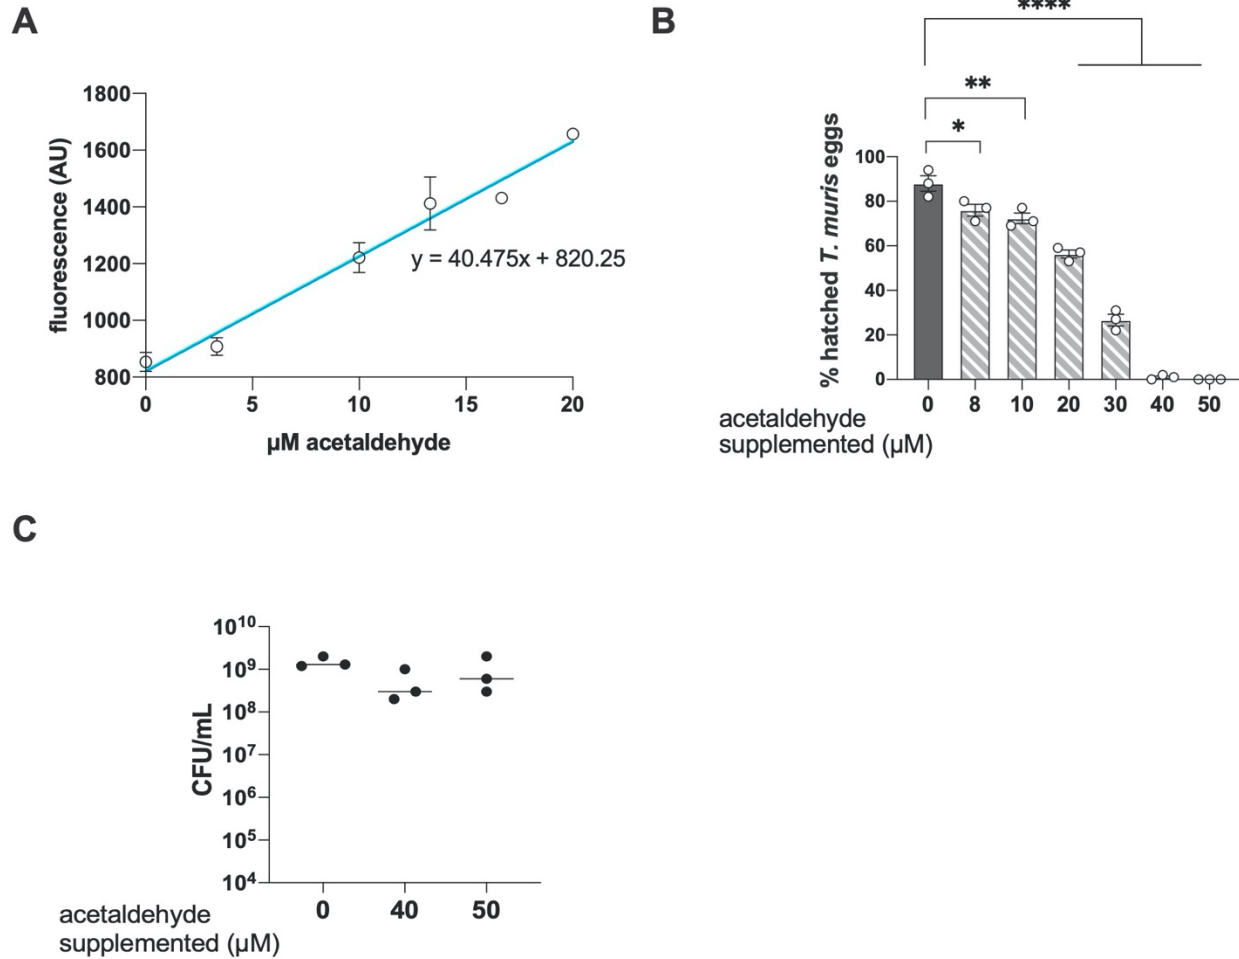

906

907 **Fig. S5 Acetaldehyde is sufficient to reduce egg hatching, related to Fig. 3.**

908 **(A)** DarkZone standard curve for acetaldehyde. Fluorescence intensity of samples  
909 incubated with known concentrations of acetaldehyde and 20 $\mu\text{M}$  DarkZone dye ( $n = 2$ ).

910 AU, arbitrary units. **(B)** Hatching rates for *T. muris* eggs incubated with WT *E. coli*  
911 cultures supplemented with acetaldehyde at concentrations indicated ( $n = 3$ ). **(C)**

912 Bacterial density of conditions indicated from B measured by dilution plating ( $n = 3$ ).

913 Measurements were taken from distinct samples. Graph shows means and SEM. B-C,

914 One-way analysis of variance (ANOVA) with Dunnett's post-test compared to 0. \*  $p <$

915 0.05, \*\*  $p < 0.01$ , \*\*\*\*  $p < 0.0001$ .

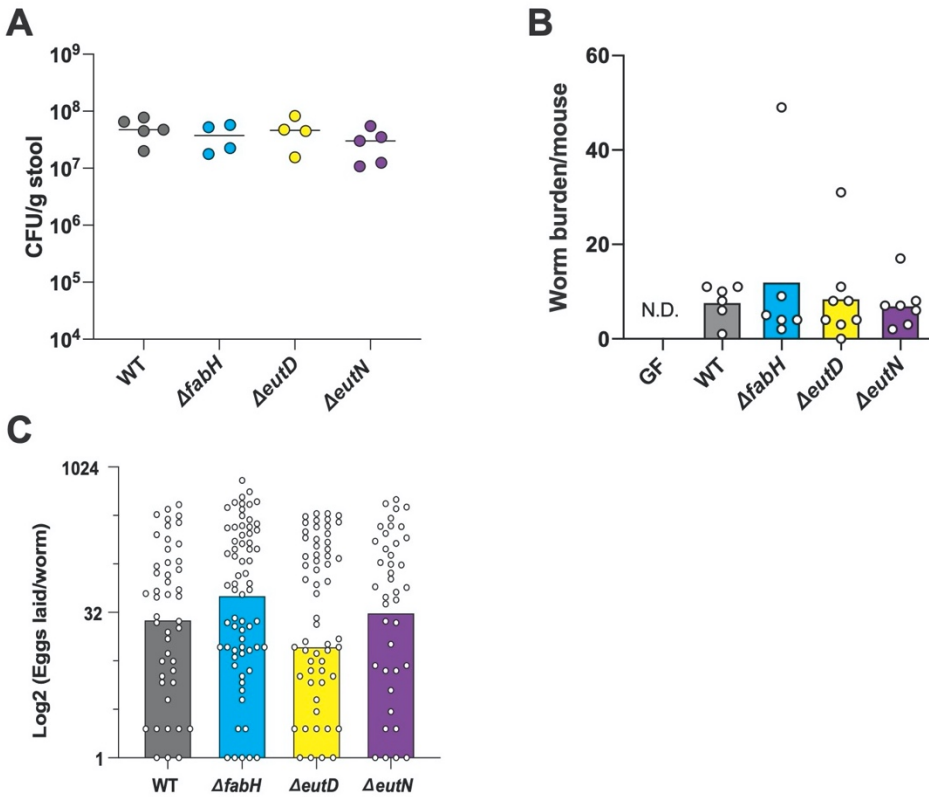

916

917 **Fig. S6 *T. muris* infection of germ-free and monocolonized mice, related to Fig 4.**

918 **(A)** *E. coli* burden 7 dpi in stool of mice gavaged with  $1 \times 10^8$  CFU of strains indicated (n  
919 = 4-5 mice per group). **(B)** Total worms harvested per mouse for germ-free (GF) and  
920 mice monocolonized with *E. coli* strains indicated; N.D. = not detected (n = 6-9 mice per  
921 group). **(C)** Quantification of eggs laid per worm. Harvested worms were incubated in  
922 individual wells of a 48-well plate with RPMI medium overnight and eggs laid were  
923 quantified using light microscopy. Measurements were taken from distinct samples.  
924 Graph shows means (A-B) or medians (C).

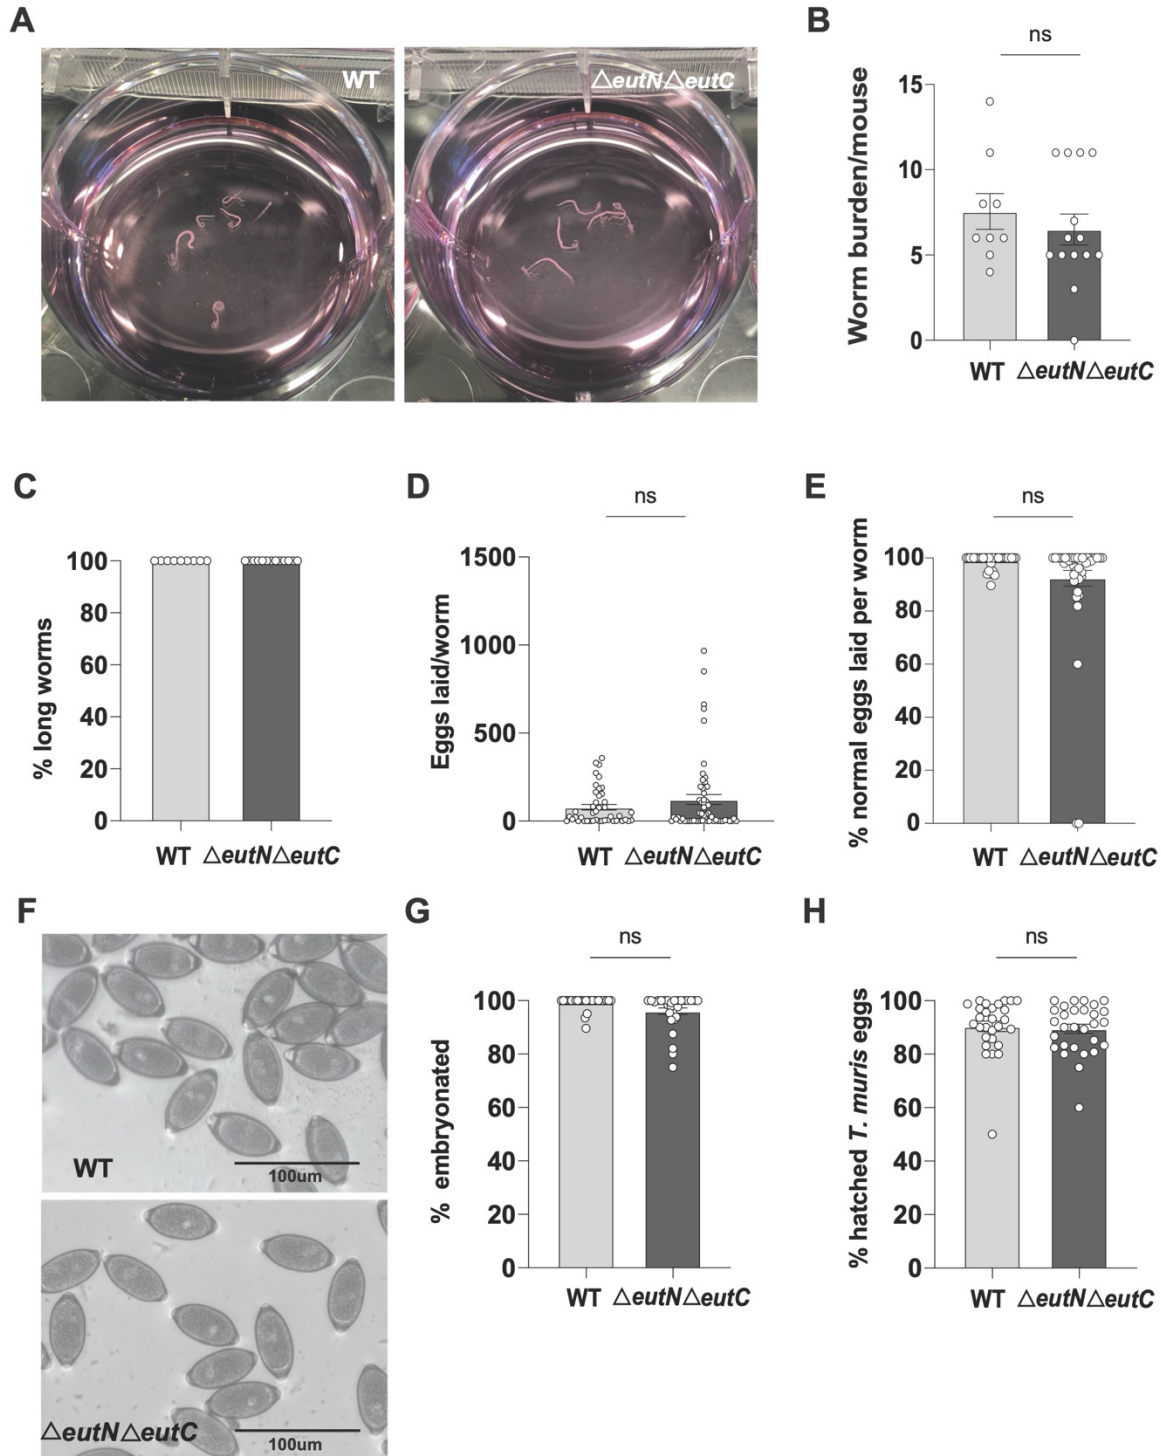

925  
926 **Fig. S7 Deleting *eutC* reverses *T. muris* fitness defects induced by  $\Delta$ *eutN* *E. coli* in**  
927 **mice. (A)** Representative photos of worms harvested from WT and  $\Delta$ *eutN* $\Delta$ *eutC*  
928 monocolonized C57BL/6 mice. **(B)** Total worms harvested per mouse for  
929 monocolonized groups indicated. Circles represent individual mice (WT, n = 9;

930  $\Delta eutN\Delta eutC$ , n = 11). **(C)** Proportion of long worms (> 1cm) harvested per mouse. **(D)**  
931 Quantification of eggs laid per worm. Harvested worms were incubated with RPMI  
932 media overnight and eggs laid were quantified using light microscopy. Circles represent  
933 individual worms (WT, n = 43;  $\Delta eutN\Delta eutC$ , n = 57). **(E)** Proportion of total eggs laid per  
934 worm in (D) with normal morphology. **(F)** Representative images of eggs laid by worms  
935 harvested from monocolonized mice groups indicated. **(G)** Percentage of embryonated  
936 eggs following 8-week incubation. **(H)** Percentage of eggs in (G) that hatched after  
937 incubation with WT *E. coli* for 4 hours at 37°C. (B-E, G-H) Two-tailed, unpaired t-test. ns  
938 = not significant. Data shown are pooled from two independent experiments.  
939 Measurements were taken from distinct samples. Graph shows means and SEM.



940 **Table S1 Top candidates and bacterial gene function (EcoCyc).** *Fab* and *eut* genes  
941 were chosen for further characterization.  
942

| <b>GENE</b> | <b>PROTEIN FUNCTION</b>                                        | <b>FUNCTIONAL GROUP</b>         |
|-------------|----------------------------------------------------------------|---------------------------------|
| <i>fabF</i> | $\beta$ -ketoacyl-[acyl carrier protein] synthase II           | Fatty acid biosynthesis         |
| <i>fabH</i> | $\beta$ -ketoacyl-[acyl carrier protein] synthase III          | Fatty acid biosynthesis         |
| <i>eutD</i> | phosphate acetyltransferase                                    | Ethanolamine utilization        |
| <i>eutN</i> | putative ethanolamine catabolic microcompartment shell protein | Ethanolamine utilization        |
| <i>pta</i>  | phosphate acetyltransferase                                    | Ethanolamine utilization        |
| <i>rfaF</i> | ADP-heptose—LPS heptosyltransferase 2                          | Lipopolysaccharide biosynthesis |
| <i>rfaH</i> | transcription antiterminator RfaH                              | Lipopolysaccharide biosynthesis |
| <i>cmoA</i> | carboxy-S-adenosyl-L-methionine synthase                       | Uridine modification in RNA     |
| <i>yhgN</i> | putative inner membrane protein                                | Antibiotic resistance           |
| <i>hoID</i> | DNA polymerase III subunit $\psi$                              | DNA replication                 |

943

944 **Table S2 Strains used in this study.**

| STRAIN  | SPECIES           | GENOTYPE                                                                                                                                                                                 | REFERENCE  |
|---------|-------------------|------------------------------------------------------------------------------------------------------------------------------------------------------------------------------------------|------------|
| BW25113 | <i>E. coli</i>    | <i>F</i> <sup>-</sup> , $\Delta(\text{araD-araB})567$ , $\Delta\text{lacZ4787}(\text{:rrnB-3})$ , $\lambda$ <sup>-</sup> , <i>rph-1</i> , $\Delta(\text{rhaD-rhaB})568$ , <i>hsdR514</i> | (39)       |
| GC833   | <i>C. elegans</i> | <i>glp-1(ar202)</i> III                                                                                                                                                                  | (25)       |
| GC1250  | <i>C. elegans</i> | <i>daf-16(m26)</i> I; <i>daf-2(e1370)</i> <i>glp-1(e2141)</i> III                                                                                                                        | (22)       |
| GC1474  | <i>C. elegans</i> | <i>glp-1(e2141)</i> III; <i>hjSi20</i> [ <i>Pmyo-2P::mCherry::unc-54</i> 3'UTR] IV; <i>zuls70</i> [pJN152: <i>end-1P::gfp::caax</i> ; <i>unc-119(+)</i> ] V                              | This study |
| GC1545  | <i>C. elegans</i> | <i>daf-5 (e1386)</i> II; <i>glp-1(e2141)</i> III                                                                                                                                         | This study |
| GC1547  | <i>E. coli</i>    | BW25113 transformed with pET28                                                                                                                                                           | This study |
| GC1549  | <i>E. coli</i>    | BW25113 $\Delta\text{fabF}::\text{kan}$                                                                                                                                                  | This study |
| GC1558  | <i>E. coli</i>    | BW25113 $\Delta\text{eutN}::\text{kan}$ , pGC735                                                                                                                                         | This study |
| GC1559  | <i>E. coli</i>    | BW25113 $\Delta\text{fabH}::\text{kan}$ , pGC738                                                                                                                                         | This study |
| GC1643  | <i>E. coli</i>    | BW25113 $\Delta\text{eutC}::\text{kan}$                                                                                                                                                  | This study |
| GC1644  | <i>E. coli</i>    | BW25113 $\Delta\text{eutC}$                                                                                                                                                              | This study |
| GC1645  | <i>E. coli</i>    | BW25113 $\Delta\text{eutN}::\text{kan}$                                                                                                                                                  | This study |
| GC1646  | <i>E. coli</i>    | BW25113 $\Delta\text{eutN}$                                                                                                                                                              | This study |
| GC1647  | <i>E. coli</i>    | BW25113 $\Delta\text{eutC } \Delta\text{eutN}::\text{kan}$                                                                                                                               | This study |
| GC1648  | <i>E. coli</i>    | BW25113 $\Delta\text{eutC}::\text{kan } \Delta\text{eutN}$                                                                                                                               | This study |
| JW1077  | <i>E. coli</i>    | BW25113 $\Delta\text{fabH}::\text{kan}$                                                                                                                                                  | (39)       |
| JW2442  | <i>E. coli</i>    | BW25113 $\Delta\text{eutD}::\text{kan}$                                                                                                                                                  |            |
| JW2440  | <i>E. coli</i>    | BW25113 $\Delta\text{eutN}::\text{kan}$                                                                                                                                                  |            |
| JW2294  | <i>E. coli</i>    | BW25113 $\Delta\text{pta}::\text{kan}$                                                                                                                                                   |            |
| JW3595  | <i>E. coli</i>    | BW25113 $\Delta\text{rfaF}::\text{kan}$                                                                                                                                                  |            |
| JW3818  | <i>E. coli</i>    | BW25113 $\Delta\text{rfaH}::\text{kan}$                                                                                                                                                  |            |
| JW4334  | <i>E. coli</i>    | BW25113 $\Delta\text{holD}::\text{kan}$                                                                                                                                                  |            |
| JW1859  | <i>E. coli</i>    | BW25113 $\Delta\text{cmoA}::\text{kan}$                                                                                                                                                  |            |
| JW3397  | <i>E. coli</i>    | BW25113 $\Delta\text{yhgN}::\text{kan}$                                                                                                                                                  |            |

945

946

947 **Table S3 Primers used in this study.**

948

| Primer                                                                              | Details                                                                                                                       |
|-------------------------------------------------------------------------------------|-------------------------------------------------------------------------------------------------------------------------------|
| <b>GCo2700 – 5'....</b><br>CCGCGCTGGTTCGTTTCtagTGCAGCAATGGCAAC<br>AACGTTG           | Forward primer- vector fragment to amplify pBR322 for Gibson assembly with PCR product bearing wild-type <i>fabH</i> sequence |
| <b>GCo2701 – 5'....</b><br>ACGTTGTTGCCATTGCTGCActaGAAACGAACCAG<br>CGCG              | Reverse primer- vector fragment to amplify pBR322 for Gibson assembly with PCR product bearing wild-type <i>fabH</i> sequence |
| <b>GCo2702 – 5'....</b><br>AGCTGTCAAACATGAGAATTATAACCGAAAAGTGA<br>CTGAGCGTACa       | Forward primer- <i>fabH</i> coding sequence for Gibson assembly with pBR322                                                   |
| <b>GCo2703 – 5'....</b><br>CTCAGTCACTTTTCGGTTATAATTCTCATGTTGA<br>CAGCTTATCATCGATAAG | Reverse primer- <i>fabH</i> coding sequence for Gibson assembly with pBR322                                                   |
| <b>GCo2708 – 5'....</b><br>agctgtcaaacatgagaattAATACGCCACGGAGGCG                    | Forward primer- <i>eutN</i> coding sequence for Gibson assembly with pBR322                                                   |
| <b>GCo2709 – 5'....</b><br>acgttggtgccattgctgcattaTTTGTGAAAATTACCTGAC<br>CGCC       | Reverse primer- <i>eutN</i> coding sequence for Gibson assembly with pBR322                                                   |
| <b>GCo2710 – 5'....</b><br>ACCCGCCTCCGTGGCGTATTaattctcatgttgacagcttat<br>catcgataag | Forward primer- vector fragment to amplify pBR322 for Gibson assembly with PCR product bearing wild-type <i>eutN</i> sequence |
| <b>GCo2711 – 5'....</b><br>AGGTAATTTTCCACAAAtaatgcagcaatggaacaacgt                  | Reverse primer- vector fragment to amplify pBR322 for Gibson assembly with PCR product bearing wild-type <i>eutN</i> sequence |
| <b>GCo2744 – 5'....</b><br>GCCGGAAGCTAGAGTAAGTAGT                                   | pBR322 forward (used to confirm gene sequence)                                                                                |

949

950

951 **Table S4 Plasmid names and descriptions.**

| Plasmid name | Description                                       |
|--------------|---------------------------------------------------|
| pGC735       | <i>eutN</i> cloned into pBR322 by Gibson assembly |
| pGC737       | pET28                                             |
| pGC738       | <i>fabH</i> cloned into pBR322 by Gibson assembly |
| pBR322       | pBR322                                            |

952

953 **Table S5 Primer sequences to verify kan cassette insertion within target genes.**

|                                    |                                       |
|------------------------------------|---------------------------------------|
| GCo296<br>AGCTTTGAAGTATTACGCCCGGAC | Forward PCR primer <i>eutD</i>        |
| GCo2797<br>CCTTTCGAGCACGGTCTACG    | Forward sequencing primer <i>eutD</i> |
| GCo2798<br>AACACCAACCAGCTTGACGC    | Reverse PCR primer <i>eutD</i>        |
| GCo2799<br>AGGCCCGGGTTTCGATC       | Reverse sequencing primer <i>eutD</i> |
| GCo2800<br>CTTCCCGATCGGCCTGAAAGG   | Forward PCR primer <i>eutN</i>        |
| GCo2801<br>CTGTAATCACCTGTGTGACGTCG | Forward sequencing primer <i>eutN</i> |
| GCo2802<br>ACTTTGGCTGCCGCAACGGC    | Reverse PCR primer <i>eutN</i>        |
| GCo2803<br>CGCGAAAACGCCCATCTCATG   | Reverse sequencing primer <i>eutN</i> |
| GCo2804<br>AATTGCCGCTCGCCTGGA      | Forward PCR primer <i>fabH</i>        |

|                                       |                                              |
|---------------------------------------|----------------------------------------------|
| GCo2805<br>GGTTTTGAGCTGCTGGACGG       | <b>Forward sequencing primer <i>fabH</i></b> |
| GCo2806<br>GCCGCAGAAGCTTCAGCAAAC      | <b>Reverse PCR primer <i>fabH</i></b>        |
| GCo2807<br>GGATAGCTCGCCGCCATATCA      | <b>Reverse sequencing primer <i>fabH</i></b> |
| GCo2808<br>GTCCTGCGGTGGTTATCCCAA      | <b>Forward PCR primer <i>pta</i></b>         |
| GCo2809<br>AAGAACTGGTTATCGCGCAAG      | <b>Forward sequencing primer <i>pta</i></b>  |
| GCo2810<br>AAGTGGGATGGCGCAATTCAT      | <b>Reverse PCR primer <i>pta</i></b>         |
| GCo2811<br>GCAGCGCAGTTAAGCAAGATAA     | <b>Reverse sequencing primer <i>pta</i></b>  |
| GCo2812<br>AATCACCACCGTTCAGGCTGC      | <b>Forward PCR primer <i>fabF</i></b>        |
| GCo2813<br>GCCACCAGGCGTAAGTGAAC       | <b>Forward sequencing primer <i>fabF</i></b> |
| GCo2814<br>CCGTTAATTAAGAACATACCGGCTCC | <b>Reverse PCR primer <i>fabF</i></b>        |
| GCo2815<br>AGTGTGGCAGCATGTTCACTACG    | <b>Reverse sequencing primer <i>fabF</i></b> |
| GCo2832<br>AACTGAAAGGCCGCTATCAGG      | <b>Forward PCR primer<br/><i>rfaF</i></b>    |

|                                      |                                                 |
|--------------------------------------|-------------------------------------------------|
| GCo2833<br>GGTTACGACAAACCGTTCAAACC   | <b>Forward sequencing primer</b> <i>rfaF</i>    |
| GCo2834<br>GCCAGGAAGGAATCTGTGCGAA    | <b>Reverse PCR primer</b><br><i>rfaF</i>        |
| GCo2835<br>CCACCCAGTCAAACCTTAATCCCTG | <b>Reverse sequencing primer</b><br><i>rfaF</i> |
| GCo2836<br>GGCGTTCATCTTTGCGATGCTG    | <b>Forward PCR primer</b><br><i>rfaH</i>        |
| GCo2837<br>CTGACGGTATAACGCAAACCGG    | <b>Forward sequencing primer</b><br><i>rfaH</i> |
| GCo2838<br>TCTCACGCCAAAGCCATCATCC    | <b>Reverse PCR primer</b><br><i>rfaH</i>        |
| GCo2839<br>CCATATTTTGCAACGTATTGCGCAC | <b>Reverse sequencing primer</b><br><i>rfaH</i> |
| GCo2840<br>CTCTTGCCACATCTTTCACCATACA | <b>Forward PCR primer</b><br><i>yhgN</i>        |
| GCo2841<br>CGAAGCCATCAGTAATGCGACTT   | <b>Forward sequencing primer</b> <i>yhgN</i>    |
| GCo2842<br>CCGAAACGCTGAAAACCTGGAC    | <b>Reverse PCR primer</b><br><i>yhgN</i>        |
| GCo2843<br>GGATGATTGCGTTCCAGCTGTT    | <b>Reverse sequencing primer</b><br><i>yhgN</i> |
| GCo2844<br>TGTGCGCTGTTGCTGATGGT      | <b>Forward PCR primer</b><br><i>cmoA</i>        |

|                                     |                                                 |
|-------------------------------------|-------------------------------------------------|
| GCo2845<br>TTTGGTATATGCCCTGGGAGTTGG | <b>Forward sequencing primer</b><br><i>cmoA</i> |
| GCo2846<br>GGTAGAAACTCCACCGCATTTGA  | <b>Reverse PCR primer</b><br><i>cmoA</i>        |
| GCo2847<br>TTAAACAACCCGTGCTGCTGCT   | <b>Reverse sequencing primer</b><br><i>cmoA</i> |
| GCo2848<br>TGTGACGCAGCAAGACTTCACT   | <b>Forward PCR primer</b><br><i>holD</i>        |
| GCo2849<br>ATGCAGACATGGAATGCTCCTCAA | <b>Forward sequencing primer</b><br><i>holD</i> |
| GCo2850<br>ACCACTTGCGTAATCGCAAACG   | <b>Reverse PCR primer</b><br><i>holD</i>        |
| GCo2851<br>TTGCCGTTTTGCGTAACTGAAAGT | <b>Reverse sequencing primer</b><br><i>holD</i> |
